# Scalable Models of Antibody Evolution and Benchmarking of Clonal Tree Reconstruction Methods

CHAO ZHANG<sup>1,\*</sup>, ANDREY V. BZIKADZE<sup>1</sup>, YANA SAFONOVA<sup>2</sup>, AND SIAVASH MIRARAB,<sup>3</sup>

<sup>1</sup> *Bioinformatics and Systems Biology, University of California, San Diego, 92093, USA*

<sup>2</sup> *Computer Science and Engineering Department, University of California, San Diego, 92093, USA*

<sup>3</sup> *Electrical and Computer Engineering, University of California, San Diego, 92093, USA*

*\*Corresponding author: Siavash Mirarab, smirarab@ucsd.edu*

## ABSTRACT

1 Affinity maturation (AM) of antibodies through somatic hypermutations (SHMs) enables  
2 the immune system to evolve to recognize diverse pathogens. The accumulation of SHMs  
3 leads to the formation of clonal trees of antibodies produced by B cells that have evolved  
4 from a common naive B cell. Recent advances in high-throughput sequencing have enabled  
5 deep scans of antibody repertoires, paving the way for reconstructing clonal trees.  
6 However, it is not clear if clonal trees, which capture micro-evolutionary time scales, can  
7 be reconstructed using traditional phylogenetic reconstruction methods with adequate  
8 accuracy. In fact, several clonal tree reconstruction methods have been developed to fix  
9 supposed shortcomings of phylogenetic methods. Nevertheless, no consensus has been  
10 reached regarding the relative accuracy of these methods, partially because evaluation is  
11 challenging. Benchmarking the performance of existing methods and developing better  
12 methods would both benefit from realistic models of clonal tree evolution specifically  
13 designed for emulating B cell evolution. In this paper, we propose a model for modeling B  
14 cell clonal tree evolution and use this model to benchmark several existing clonal tree  
15 reconstruction methods. Our model, designed to be extensible, has several features: by  
16 evolving the clonal tree and sequences simultaneously, it allows modelling selective

17 pressure due to changes in affinity binding; it enables scalable simulations of millions of  
18 cells; it enables several rounds of infection by an evolving pathogen; and, it models  
19 building of memory. In addition, we also suggest a set of metrics for comparing clonal trees  
20 and for measuring their properties. Our benchmarking results show that while maximum  
21 likelihood phylogenetic reconstruction methods can fail to capture key features of clonal  
22 tree expansion if applied naively, a very simple postprocessing of their results, where super  
23 short branches are contracted, leads to inferences that are better than alternative methods.

24 *Key words:* Antibody evolution, Clonal trees, Joint tree and sequence evolution.

25

26 Antibodies are Y-shaped proteins consisting of two identical heavy chains and two  
27 identical light chains. Antibodies are produced by *B cells* and are used by the immune  
28 system to recognize, bind, and neutralize pathogens (also called *antigen*). Unlike other  
29 proteins, antibodies are not encoded in the genome directly but present results of somatic  
30 *V(D)J recombination* of *immunoglobulin (IG) loci* (Kurosawa and Tonegawa, 1982). Each  
31 chain of each antibody is a concatenation of one of V, D (only for heavy chain), and J  
32 genes and is known as an *IG gene*. An IG gene contains three *complementarity-determining*  
33 *regions* (CDRs) representing antigen binding sites. CDRs are separated by four *framework*  
34 *regions* (FRs) that form a stable structure displaying CDRs on the antibody surface.

35 After successful binding of an antibody to a given pathogen, the corresponding B  
36 cell undergoes the *affinity maturation* (AM) process aiming to improve the *affinity* (i.e.,  
37 binding ability) of the antibody (Tonegawa, 1983; Neuberger and Milstein, 1995). First,  
38 the targeting B cell moves to the *germinal center* (GC) of a lymph node where it  
39 undergoes *clonal expansion*: cell divisions that increase the pool of antibodies that bind to  
40 the antigen. Then, certain enzymes in the B cell and its clones are activated and introduce  
41 *somatic hypermutations* (SHMs) in the utilized IG genes as a means to improve affinity  
42 (Muramatsu *et al.*, 2000). SHMs change the three-dimensional structure of an antibody

43 (and thus its ability to bind to an antigen) in a stochastic way. The regulatory mechanisms  
44 of the immune system play the role of natural selection by expanding B cells with high  
45 affinity for antigen and killing self-reactive B cells with potentially harmful mutations. The  
46 AM process activates naive B cells (i.e., those that have not been exposed to an antigen)  
47 and differentiates them into *memory* and *plasma* B cells. Memory B cells can be repeatedly  
48 activated and subjected to the AM, while plasma B cells can secrete massive levels of  
49 neutralizing antibodies. Recent studies show that CDRs, which include the binding sites,  
50 accumulate more SHMs compared to FRs (Hsiao *et al.*, 2019; Safonova and Pevzner, 2019).

51 The AM process leads to the formation of clonal lineages within a given antibody  
52 repertoire, where each clonal lineage is formed by descendants of a single naive B cell. The  
53 expressed IG transcripts within the same clonal lineage share a common combination of V,  
54 D, and J genes and differ by SHMs only. The evolutionary history of each clonal lineage  
55 can be represented by a *clonal tree*, where each vertex corresponds to a B cell and each B  
56 cell is connected by a directed edge with all its immediate descendants.

57 Recent development of sequencing technologies have enabled high-throughput  
58 scanning of antibody repertoires (*Rep-Seq*) and have opened up new avenues for studying  
59 adaptive immune systems (Georgiou *et al.*, 2014; Robinson, 2015; Yaari *et al.*, 2015;  
60 Watson *et al.*, 2017; Miho *et al.*, 2018). Rep-Seq technologies enabled AM analysis of  
61 antibody repertoires responding to antigens of various diseases: flu (Laserson *et al.*, 2014;  
62 Horns *et al.*, 2019), HIV (Haynes *et al.*, 2012; Sok *et al.*, 2013a), hepatitis (Galson *et al.*,  
63 2016; Eliyahu *et al.*, 2018), multiple sclerosis (Stern *et al.*, 2014; Lossius *et al.*, 2016),  
64 rheumatoid arthritis (Elliott *et al.*, 2018). Such analysis allows biologists to identify  
65 broadly neutralizing antibodies (Yermanos *et al.*, 2018) and reveal antigen-specific and  
66 general mutation patterns (Horns *et al.*, 2019; Hsiao *et al.*, 2019).

67 An intriguing feature of the clonal trees is that due to the short time frame they  
68 represent, they can differ from phylogenetic trees. Some of the sequenced nodes may  
69 belong to the internal nodes of the tree instead of the tips. Also, there is no reason to

70 assume that the tree should be bifurcating or even close to bifurcating. Thus, unlike  
71 traditional phylogenetics, perhaps Steiner trees (which can put observations at *some* of the  
72 internal nodes) or spanning trees (that put an observation at *all* internal nodes) should be  
73 preferred for reconstructing antibody sequences (Fig. 1a). Various reconstruction methods  
74 have been developed attempting to recover clonal trees from antibody sequences (e.g.,  
75 Jiang *et al.*, 2013; Sok *et al.*, 2013b; Lee *et al.*, 2017; Hoehn *et al.*, 2017; Horns *et al.*, 2016;  
76 Lees and Shepherd, 2015; DeWitt *et al.*, 2018). Some of these methods use simple  
77 clustering methods (e.g., Jiang *et al.*, 2013), while others formulate the problem as a  
78 Steiner tree problem (Sok *et al.*, 2013b; Lee *et al.*, 2017; Horns *et al.*, 2016; DeWitt *et al.*,  
79 2018) or maximum-likelihood (ML) phylogenetic tree reconstruction under models of  
80 sequence evolution (Hoehn *et al.*, 2017; Lees and Shepherd, 2015).

81 In order to evaluate methods proposed for reconstructing clonal trees, we need  
82 models for antibody sequence evolution and clonal tree expansion that can be used for  
83 simulation. This modeling step is challenging for several reasons. *i*) Since selection is an  
84 important force in AM, it needs to be modelled directly, or else, the shape of the resulting  
85 trees will not be realistic. Traditional phylogenetics simulations first simulate a tree of  
86 sampled taxa and then evolve sequences down the tree. This two-step approach simplifies  
87 simulation but is not sufficient for AM because the strong selection effects make the  
88 evolution of the clonal tree and the antibody sequences interdependent. A better approach  
89 is to co-evolve the tree and *all* evolving sequences. The challenge in co-evolving is to design  
90 a principled model for how sequences impact evolution and to develop a scalable  
91 simulation algorithm that can generate millions of cells (which can then be subsampled).  
92 *ii*) Literature suggests that there are hotspots and coldspots of SHMs (e.g., Rogozin and  
93 Kolchanov, 1992; Pham *et al.*, 2003). However, traditional models of sequence evolution  
94 are i.i.d and will miss the context-dependence. *iii*) Different types of antibody cells (e.g.,  
95 activated and memory cells) have very different mutational and selection behaviors and  
96 these distinctions need to be modelled.

97           There have been several attempts at designing models that are appropriate for  
98 clonal expansion in AM (e.g., Childs *et al.*, 2015; Amitai *et al.*, 2017; Reshetova *et al.*,  
99 2017; Davidsen and Matsen, 2018). As many processes involved are complex and hard to  
100 model exactly, these models have all taken different routes. For example, determining  
101 affinities of sequences to hypothetical antigens is difficult, as affinity binding itself is a  
102 complicated chemical process, and each method models affinity in a different fashion.  
103 Nevertheless, all these methods have limitations, which we will return to in our discussion  
104 session. In summary, they do not scale to very large number of cells (millions), they allow  
105 for simulating one round of infection (as opposed to an evolving antigen and recurring  
106 infections), and they do not model various types of antibody B cells. We propose that to  
107 simulate realistic clonal trees and correctly benchmark lineage reconstruction tools, we  
108 need models that are generic and flexible, so that they can be updated as a better  
109 understanding of the underlying processes is developed. One goal of the present work is to  
110 provide such a scalable and flexible simulation framework. In addition to simulation, we  
111 note that comparing clonal trees and characterizing their properties require extending  
112 metrics from phylogenetics to trees with internal node samples and multifurcations.

113           In this paper, we make several contributions. *i*) We introduce a general birth, death,  
114 transformation (BDT) model and describe how BDT can be instantiated to create a model  
115 of AM that simultaneously co-evolves the clonal tree and antibody sequences. *ii*) We  
116 introduce a scalable sampling algorithm for our model that enables generating very large  
117 trees (millions of cells). *iii*) We refine existing metrics and define new ones for  
118 characterizing properties (e.g., balance) of clonal trees and define a set of evaluation  
119 metrics for comparing them. *iv*) We study a small post-processing step applied to ML  
120 phylogenetic inference and show that it effectively deals with the problem of internal node  
121 sampling in antibody sequences. *v*) We perform extensive simulation studies (Fig. 1b)  
122 under various parameters and benchmark the performance of seven reconstruction  
123 methods: minimum spanning tree, existing tools BRILIA (Lee *et al.*, 2017), IgPhyML

6

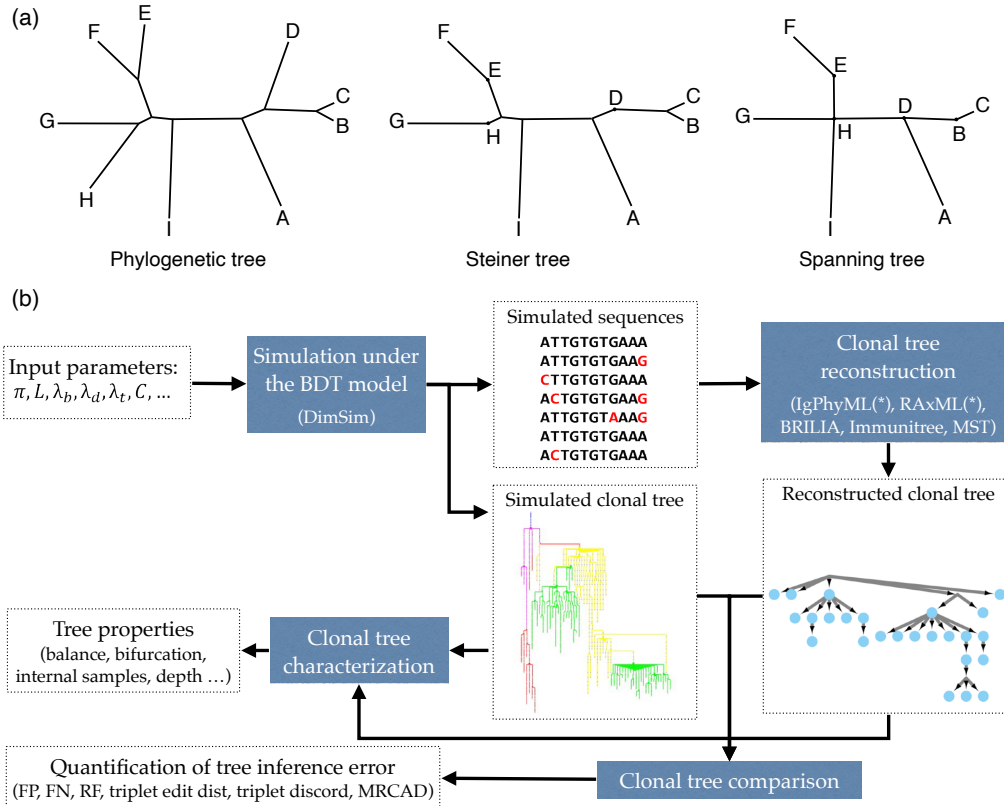

Fig. 1. (a) Examples of a phylogenetic tree, a Steiner tree, and a spanning tree. Letters indicate sequenced data. Phylogenetic trees put all data points at leaves and none at internal nodes, spanning trees put data at every node (whether internal or leaf), and Steiner trees are in between (some but not all internal nodes correspond to data). (b) The evaluation framework. The BDT model, parameterized by several values (Table 1) is first sampled using the fast algorithm implemented in DIMSIM to create the simulated (i.e., “true”) sequence data and clonal trees. These trees are then reconstructed from the simulated sequence data using various methods. The reconstructed clonal tree is compared to the simulated tree using several metrics adopted here to account for internal node sampling and multifurcation. Properties of true and inferred trees are measured using metrics such as balance and resolution.

124 (Hoehn *et al.*, 2017), RAxML (Stamatakis, 2014), and Immunitree (Sok *et al.*, 2013b), and  
 125 modified methods IgPhyML\* and RAxML\*). We study how the parameters of the AM  
 126 model impact properties of clonal trees and reconstruction error. These studies showcase  
 127 the power and flexibility of our benchmarking framework.

128

## GENERATIVE MODEL

129

We first define a general Birth/Death/Transformation (BDT) model and introduce  
 130 an efficient algorithm for sampling trees from the BDT model. We then instantiate the  
 131 general model for simulating AM processes.

132 *The birth/death/transformation (BDT) model*

133 Forward-time birth-death models are used extensively in macro-evolutionary  
134 modelling (Nee, 2006), whereas micro-evolution simulations often use coalescent models,  
135 which hope to approximate forward time evolution, albeit not always successfully (Stadler  
136 *et al.*, 2015). We start by describing a general forward-time model that can allow realistic  
137 micro-evolutionary simulations by ensuring that birth and death rates are not constant,  
138 and instead change with properties of evolving units (e.g., cells).

139 *Model description.* In the BDT model, a set of *particles* continuously undergo  
140 birth (B), death (D), and transformation (T) events. Each particle  $i$  has a list of properties  
141  $\mathbf{x}_i \in \mathbb{R}_+^N$ . At each moment in time, the system contains a set  $S$  of  $n$  active particles, and  
142 each active particle  $i \in S$  undergoes birth, death, and transformation events according to  
143 independent Poisson point processes. In the birth event, a particle  $i$  is removed from  $S$  and  
144 new particles  $j$  and  $k$ , with properties  $\mathbf{x}_j$  and  $\mathbf{x}_k$ , are added to  $S$ ; properties  $\mathbf{x}_j$  and  $\mathbf{x}_k$  are  
145 drawn from a distribution determined by  $\mathbf{x}_i$  and model parameters. In the event of the  
146 death for particle  $i$ , it is removed from  $S$ . In the transformation event, a particle  $i$  is  
147 removed from  $S$  and a new particle  $j$  with properties  $\mathbf{x}_j$ , drawn from a distribution  
148 determined by  $\mathbf{x}_i$ , is added to  $S$ . Starting from a single node and continuously applied, this  
149 process defines a rooted tree where nodes are all particles that ever existed (including those  
150 that died); birth events create bifurcations, transformation events create nodes with one  
151 child, and death events create leaves with no child. The tree can be subsampled as desired.

152 For each particle  $i \in S$ , the birth rate, death rate, and transformation rate are  
153 thoroughly determined by its properties  $\mathbf{x}_i$  and  $\mathbf{S} = \sum_{j \in S} \mathbf{x}_j$ , the sum of property vectors  
154 over all particles. We let  $\Lambda_B(\mathbf{x}_i, \mathbf{S})$ ,  $\Lambda_D(\mathbf{x}_i, \mathbf{S})$ , and  $\Lambda_T(\mathbf{x}_i, \mathbf{S})$  denote the birth, death, and  
155 transformation rates, respectively. In the time interval between two events for any two  
156 particles in the system, we assume a memoryless process. Thus, these rates remain constant  
157 between any two events but can change when an event happens. The ratio between the

8

158 birth rate and the death rate, both of which are functions of the particle properties, can be  
 159 thought of as the factor controlling the selective pressure, which can be time-variant.

160 Because of the memoryless property, the time until the next BDT event always  
 161 follows the exponential distribution with rates  $\Lambda_B(\mathbf{x}_i, \mathbf{S})$ ,  $\Lambda_D(\mathbf{x}_i, \mathbf{S})$ , and  $\Lambda_T(\mathbf{x}_i, \mathbf{S})$  for each  
 162 event type. The time until any event for any particle follows an exponential distribution  
 163 with  $\lambda = \sum_{i \in S} (\Lambda_B(\mathbf{x}_i, \mathbf{S}) + \Lambda_D(\mathbf{x}_i, \mathbf{S}) + \Lambda_T(\mathbf{x}_i, \mathbf{S}))$ . The probability of the next event being  
 164 a specific event  $E \in \{B, D, T\}$  for a particular particle  $i$  is  $\Lambda_E(\mathbf{x}_i, \mathbf{S})/\lambda$ . Specifying the rate  
 165 functions and the distribution of properties at the initial state fully specifies the model.

166 *Efficient sampling under the general model.* The model we described can be  
 167 efficiently sampled if we also assume that we are able to write  $\Lambda_E(\mathbf{x}_i, \mathbf{S}) = \frac{P_E(\mathbf{x}_i, \mathbf{S})}{Q(\mathbf{S})}$  where  
 168  $P_E : \mathbb{R}_{\geq 0}^N \times \mathbb{R}_{\geq 0}^N \rightarrow \mathbb{R}_{\geq 0}$  and  $Q : \mathbb{R}_{\geq 0}^N \rightarrow \mathbb{R}_{> 0}$  are polynomial functions with a constant  
 169 degree, where coefficients of  $P_E$  are non-negative. Thus, for any particle  $i \in S$ , the birth  
 170 rate can be written as  $\Lambda_B(\mathbf{x}_i, \mathbf{S}) = \frac{\sum_{\alpha, \beta \in \Gamma} \mathcal{B}_{\alpha, \beta} \mathbf{S}^\beta \mathbf{x}_i^\alpha}{\sum_{\beta \in \Gamma} Q_\beta \mathbf{S}^\beta}$  where  $\Gamma = [0 \dots \gamma]^N$  for some integer  $\gamma$ ,  
 171  $\mathcal{B}_{\alpha, \beta}$  and  $Q_\beta$  are coefficients of the polynomials, and  $\mathbf{a}^{\mathbf{b}}$  denotes  $\prod_i \mathbf{a}_i^{\mathbf{b}_i}$  for vectors  $\mathbf{a}$  and  $\mathbf{b}$ .  
 172 We can write  $\Lambda_D(\mathbf{x}_i, \mathbf{S})$  and  $\Lambda_T(\mathbf{x}_i, \mathbf{S})$  similarly by replacing  $\mathcal{B}_{\alpha, \beta}$  with  $\mathcal{D}_{\alpha, \beta}$  and  $\mathcal{T}_{\alpha, \beta}$ .

173 With this assumption,  $\lambda = \frac{\sum_{\alpha, \beta \in \Gamma} P_{\alpha, \beta} \mathbf{S}^\beta \theta_\alpha}{\sum_{\beta \in \Gamma} Q_\beta \mathbf{S}^\beta}$  where  $P_{\alpha, \beta} = \mathcal{B}_{\alpha, \beta} + \mathcal{D}_{\alpha, \beta} + \mathcal{T}_{\alpha, \beta}$  and  
 174  $\theta_\alpha = \sum_{i \in S} \mathbf{x}_i^\alpha$  for all  $\alpha$  values (note that  $\mathbf{S} = \theta_1$ ). Thus, to efficiently sample the time till  
 175 the next event, we only need  $\theta_\alpha$  values which we can simply store and update in constant  
 176 time after each event. This allows for a constant time sampling of the next event time (in  
 177 terms of  $n$ ) for constants  $N$  and  $\gamma$ . Once we sample the time till the next event, we need to  
 178 sample one of the three possible events. The probability of the next event being birth for  
 179 particle  $i$  is (derivations shown in the supplementary material)

$$\begin{aligned} \frac{\Lambda_B(\mathbf{x}_i, \mathbf{S})}{\lambda} &= \frac{\Lambda_B(\mathbf{x}_i, \mathbf{S})}{\sum_{j \in S} (\Lambda_B(\mathbf{x}_j, \mathbf{S}) + \Lambda_D(\mathbf{x}_j, \mathbf{S}) + \Lambda_T(\mathbf{x}_j, \mathbf{S}))} \\ &= \sum_{\alpha, \beta \in \Gamma} \left( \left( \frac{\mathcal{B}_{\alpha, \beta}}{P_{\alpha, \beta}} \right) \left( \frac{\mathbf{x}_i^\alpha}{\theta_\alpha} \right) \left( \frac{P_{\alpha, \beta} \mathbf{S}^\beta \theta_\alpha}{\sum_{\bar{\alpha}, \bar{\beta} \in \Gamma} P_{\bar{\alpha}, \bar{\beta}} \mathbf{S}^{\bar{\beta}} \theta_{\bar{\alpha}}} \right) \right). \end{aligned} \quad (1)$$

180 and probability of each death and transformation events can be written similarly.

181 We now suggest the following sampling procedure (see Algorithm S1):



- 182 1. Sample  $(\alpha, \beta)$  pair (representing one term of the polynomial) from a multinomial  
183 distribution on  $\Gamma \times \Gamma$  where each pair has probability  $\frac{P_{\alpha,\beta} \mathbf{S}^\beta \theta_\alpha}{\sum_{\bar{\alpha}, \bar{\beta} \in \Gamma} P_{\bar{\alpha}, \bar{\beta}} \mathbf{S}^{\bar{\beta}} \theta_{\bar{\alpha}}}$ .
- 184 2. Sample particle  $i$  from a distribution on  $S$  where each  $i$  has probability  $\mathbf{x}_i^\alpha / \theta_\alpha$ .
- 185 3. Sample birth, death, or transformation with probabilities  $\frac{B_{\alpha,\beta}}{P_{\alpha,\beta}}$ ,  $\frac{D_{\alpha,\beta}}{P_{\alpha,\beta}}$ , and  $\frac{T_{\alpha,\beta}}{P_{\alpha,\beta}}$ .

186 In this procedure, the probability of selecting the birth event for a particle  $i$  is  
187 simply  $\sum_{\alpha,\beta} \frac{B_{\alpha,\beta}}{P_{\alpha,\beta}} \frac{\mathbf{x}_i^\alpha}{\theta_\alpha} \frac{P_{\alpha,\beta} \mathbf{S}^\beta \theta_\alpha}{\sum_{\bar{\alpha}, \bar{\beta} \in \Gamma} P_{\bar{\alpha}, \bar{\beta}} \mathbf{S}^{\bar{\beta}} \theta_{\bar{\alpha}}}$ , which matches Equation (1) (ditto for death and  
188 transformation events). Step 1 takes constant time (in terms of  $n$ ) given that  $\theta_\alpha$  values  
189 (and thus  $\mathbf{S}$ ) are pre-computed for all  $\alpha$ ; step 2 can be achieved in  $O(\log n)$  time using an  
190 interval tree data structure to store partial sums of  $\mathbf{x}_j^\alpha$ 's (see Algorithm S1); step 3 takes  
191 constant time. Thus, a tree on  $k$  nodes drawn from the distribution defined by the BDT  
192 process can be sampled in  $O(k \log(k))$  time by repeated applications of Algorithm S1.

### 193 *Antibody Affinity Maturation (AM) model*

194 We now define a specific case of the general model for dynamic antibody affinity  
195 maturation. Our goal is to model how antibody-coding sequences evolve in response to  
196 several rounds of infections by an evolving antigen (e.g., flu). Simulations according to this  
197 AM model are implemented in a C++ tool called Dynamic IMMUNO-SIMULATOR (DIMSIM).

198 In this paper, we focus on simulating the heavy chain sequences only (thus, by  
199 antibody-coding sequences we mean only the heavy chains). While light chains might be  
200 important for some immunological applications, most existing Rep-Seq studies focus on  
201 sequencing heavy chains only (e.g., Stern *et al.*, 2014; Ellebedy *et al.*, 2016; Magri *et al.*,  
202 2017; Horns *et al.*, 2019). Also, since only memory B cells can be repeatedly activated by  
203 the encounter with an antigen, we will simulate memory B cells only. Plasma B cells do not  
204 undergo SHMs and represent terminal states of the clonal lineage development and thus  
205 can be sampled from the leaves of the simulated tree if needed. We will refer to a B cell  
206 that has just encountered an antigen and moved to a GC as an *activated B cell* (Fig. 2a).

207 *Rounds and stages.* The model simulates  $r$  rounds of infection. Each round consists  
208 of two stages, an *infected* stage, where a set of new antigens initiate a response that  
209 activates the B cells being modeled, and a *dormant* stage, where the B cells being modeled  
210 are not actively involved in an immune response. The generative model is identical in the  
211 two stages but is parameterized differently. The system can switch between the two stages  
212 using user-defined rules including those that reflect infection progression (described below).  
213 During the infected stage of round  $i$ , we assume the existence of a *given* target amino-acid  
214 sequence of length  $L$  ( $\zeta_i^{(1)}, \dots, \zeta_i^{(L)}$ ) (without any stop codon), defined as the best possible  
215 antibody-coding sequence that can bind to the present antigen. When antigens evolve from  
216 one round to the next, the target should also change. The model has many parameters  
217 related to the immune system properties (Table 1), which we define as we progress.

218 *Cell Properties.* In the AM model, each particle  $i$  represents a B cell with the  
219 property vector  $\mathbf{x}_i = (g_i, s_i, t_i, g_i/a_i, g_i a_i)$ . The binary property  $g_i = 1$  indicates whether a  
220 cell  $i$  has entered a germinal center of a lymph node, in which case we call it an activated B  
221 cell (or “activated cell” for short);  $g_i = 0$  indicates a memory B cell outside lymph nodes,  
222 which we call a “memory cell” for simplicity. The  $s_i$  property encodes the DNA sequence  
223 of B cell  $i$  coding for the variable region of the heavy chain with a fixed length  $3L$  (for the  
224 sake of simplicity, we assume the faith of the cell depends only on the variable region of  
225 the heavy chain). The other properties are derived from the first two properties, but we  
226 keep them as part of  $\mathbf{x}_i$  because they allow us to define  $\Lambda_E(\mathbf{x}_i, \mathbf{S})$  functions as polynomials  
227 of saved properties (Table 2); this, in turns, enables the use of our fast sampling algorithm.  
228 Property  $t_i$  denotes the rate of transformation. For memory cells,  $t_i$  is the rate at which  
229 the memory cell activates and becomes an activated cell in response to an antigen. For  
230 activated cells,  $t_i$  is the rate at which the activated cells mature into memory cells. Thus,  
231 transformations, which only happen during the infected stage, create a child cell  $j$  with  
232 property  $g_j = 1 - g_i$  and  $s_j = s_i$ . Property  $a_i$  denotes the strength of affinity binding of  
233 the Ig receptor of the cell  $i$  to the antigen. We let  $\sigma = \sum_{i \in S} g_i a_i$  denote the fifth element of

Table 1. *Parameters of the AM model*

| Parameter name            | Default value                | Parameter description                                                                     |
|---------------------------|------------------------------|-------------------------------------------------------------------------------------------|
| $\lambda'_d$              | $1/402$                      | Rate (inverse life time) of cell death for memory cells ( $\text{days}^{-1}$ )            |
| $\lambda_b$               | 6                            | Rate of cell division for activated B cells ( $\text{days}^{-1}$ )                        |
| $\lambda_d$               | $10^4$                       | Rate of cell death during dormant stage ( $\text{day}^{-1}$ ).                            |
| $\lambda_t$               | 0.01                         | Rate of activation of a typical responsive memory cell                                    |
| $\rho_p$                  | $1/100$                      | Portion of activated B cells that turn into plasma cells per cell division                |
| $\rho_m$                  | $1/4$                        | Portion of activated B cells that turn into memory B cells per cell division              |
| $\mu$                     | $5 \times 10^{-4}$           | Rate of SHMs per base pair per generation                                                 |
| $\mathbf{K}^5$            | See appendix                 | Empirical 5-mer mutation frequencies per generation                                       |
| $L$                       | 125                          | Length of the amino acid antibody-coding sequence (assuming the length is fixed)          |
| <b>CDR</b>                | {31...35, 50...65, 98...114} | Positions of the three CDR regions (amino acid coordinates)                               |
| $\delta(i, j)$            | Table S1                     | BLOSUM matrix defined on a pair of amino-acids $i$ and $j$                                |
| $\Delta_0$                | -120                         | BLOSUM score of a typical responsive memory B cell antibody-coding sequence to target     |
| $\Delta'_0$               | -75                          | BLOSUM score of activated B cell antibody-coding sequences that leads to cure             |
| $w_f$                     | $1/3$                        | BLOSUM score multiplier of non-CDR positions (i.e., FRs)                                  |
| $\kappa$                  | 2                            | BLOSUM score ratio of antibody-coding sequences to antigen sequences                      |
| $A$                       | 0.1                          | Selective pressure: factor connecting sequence similarity and log binding affinity        |
| $\rho_a$                  | $1/2$                        | Factor connecting log affinity and B cell activation (sensitivity to affinity level $A$ ) |
| $C$                       | $10^5$                       | Carrying capacity limited by total resources (see text for meaning)                       |
| $M$                       | $Ce^{A\Delta'_0}$            | The threshold of the sum of affinity for a stage change                                   |
| $r$                       | 56                           | Rounds of viral infections                                                                |
| $\hat{\Psi}$              | See appendix                 | Nucleotide sequence of the initial B cell                                                 |
| $\zeta_1, \dots, \zeta_r$ | See appendix                 | Target amino acid sequences for viral infections in each round                            |
| $\eta_1, \dots, \eta_r$   | See appendix                 | Flu sequences assumed as antigens in the simulation                                       |
| $t_1, \dots, t_r$         | See appendix                 | Starting time of each infected stage (day)                                                |

Table 2. *Birth, death, and transformation rates. See Table S3 for polynomial forms.*

| Rate functions                        | Infected stage                                                                                                              | Dormant stage                          |
|---------------------------------------|-----------------------------------------------------------------------------------------------------------------------------|----------------------------------------|
| $\Lambda_B(\mathbf{x}_i, \mathbf{S})$ | $g_i \lambda_b + (1 - g_i) \times 0$                                                                                        | 0                                      |
| $\Lambda_D(\mathbf{x}_i, \mathbf{S})$ | $g_i \left( \frac{\lambda_b (1 - \rho_p - \rho_m)}{C} \frac{\sigma}{a_i} + \rho_p \lambda_b \right) + (1 - g_i) \lambda'_d$ | $g_i \lambda_d + (1 - g_i) \lambda'_d$ |
| $\Lambda_T(\mathbf{x}_i, \mathbf{S})$ | $t_i = g_i \rho_m \lambda_b + e^{-\rho_a A \Delta_0} a_i^{\rho_a} (1 - g_i)$                                                | 0                                      |

234 vector  $\mathbf{S}$ ; thus,  $\sigma$  is the total affinity of activated cells and  $a_i/\sigma$  is the fraction of total  
 235 affinity assigned to a cell. We will show how  $t_i$  and  $a_i$  are set based on the sequence of  $i$   
 236 and the target. The fourth and fifth properties are simple functions of other properties.

237 *Sequence evolution.* Each cell has a fixed sequence, and mutations occur at the  
 238 time of a cell birth, which happens only for activated cells in the infected stage. After a  
 239 birth event for cell  $i$ , properties  $s_j$  and  $s_k$  of child cells  $j$  and  $k$  are chosen independently  
 240 and identically at random. While any sequence evolution model could be incorporated in  
 241 the DIMSIM framework, we describe below a 5-mer-based model used in these analyses.

*Determining sequence affinity.* Affinity  $a_i$  is only defined and used during the infected stage where the target is available (it is undefined during the dormant stage). We define the affinity  $a_i$  of a cell  $i$  as a function of its sequence  $s_i$  and the target sequence  $\zeta$ . The closer the sequence to the target, the higher its affinity should be. Exact relationships between the sequences and affinity are not known and cannot be easily modelled. For the purpose of benchmarking, any reasonable function should suffice. Assuming  $f_\zeta(s_i)$  gives a measure of closeness of the sequence to the target in the affinity space, we set

$$a_i \doteq e^{Af_\zeta(s_i)}$$

242 where  $A$  is a constant factor used to calibrate the selective pressure (see below). We will  
243 describe our particular choice of function  $f_\zeta(s_i)$  using BLOSUM similarity below.

244 *Rates.* The event rates are functions of cell properties and the stage (Table 2).  
245 During the dormant stage, there are no births or transformations; cells only die with a very  
246 high uniform rate  $\lambda_d$  for activated cells and a low uniform rate  $\lambda'_d$  for memory cells.

247 During the infected stage, we adjust death rates of cells based on their affinities but  
248 keep the birth rates constant; this interplay is used to simulate the selective pressure. An  
249 activated cell can undergo cell division at a uniform rate  $\lambda_b$ , differentiate into a memory  
250 cell at a uniform rate  $t_i = \rho_m \lambda_b$  or a plasma-like cell at a uniform rate  $\rho_p \lambda_b$  driven by  
251 helper T cells, and undergo apoptosis (i.e., die) driven by follicular dendritic cells (FDCs).  
252 We do not model plasma-like cells; instead, both differentiation into plasma-like cells and  
253 apoptosis are treated as death events (Figure 2a). The rate of apoptosis of activated cell  $i$   
254 is inversely proportional to the amount of resources (antigens and FDCs) to which cell  $i$   
255 has access when competing against other activated cells. Thus, the proportion of resources  
256 available to cell  $i$  is modelled by the affinity proportion  $a_i/\sigma$  (i.e., the affinity of the cell to  
257 the antigen normalized by the current sum of the affinity of all activated cells). This  
258 affinity proportion is impacted by the choice of parameter  $A$ . The lower the  $A$ , the more  
259 uniform these proportions become, as expected with low selective pressure; conversely, as

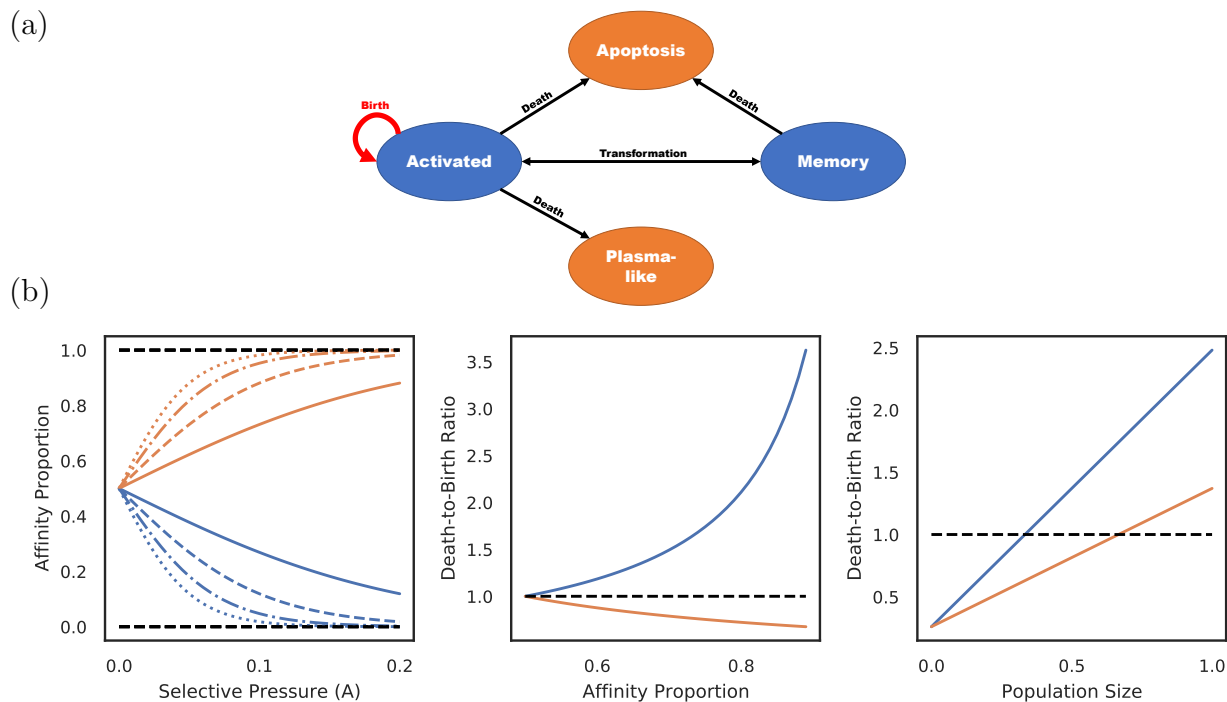

Fig. 2. (a) States of cells and transitions during infected stage. Only states colored blue are modeled. Transitions to states colored orange are treated as death events. (b) Consider a population of activated B cells where all cells have one of two sequences: L (Blue) or H (Orange). Let  $\rho$  be the ratio of affinity of H-type cells to L-type cells, and let the affinity proportion be the total affinity of H (or L) cells over the affinity of all cells (i.e.,  $\rho/1+\rho$  for H and  $1/1+\rho$  for L). Left: The affinity proportion as a function of the selective pressure  $A$  when the sequence closeness to the target is  $f_c(L) = -50$  and  $f_c(H) = -10, -20, -30$ , or  $-40$  (respectively: dotted, dashed/dotted, dashed, or solid). Middle: the ratio of death rate to birth rate as a function of affinity proportion of H cells, fixing the population size to the carrying capacity. Right: ratio of death rate to birth rate as a function of the population size normalized by the carrying capacity, fixing  $\rho = 2$ . All other parameters set to defaults (Table 1). The selective pressure  $A$  and the level of binding control the portion of affinity taken up by better sequences (left), which controls the growth of the cell type (middle), but the growth rate is also a function of the total population size (right).

260  $A$  increases,  $a_i/\sigma$  values further diverge between low affinity and high affinity cells (Fig. 2b).

261 Thus,  $A$  can be used to control the strength of the selective pressure.

The memory cells undergo apoptosis at a uniform rate  $\lambda'_d$ . They can also activate by helper T cells to enter the germinal center and become an activated cell at the rate  $t_i$  set to:

$$t_i \doteq \lambda_t e^{\rho_a A (\Delta_c(\xi_i) - \Delta_0)} = \lambda_t e^{-\rho_a A \Delta_0} a_i^{\rho_a}$$

262 Note that activation rate of memory cells increases monotonically with their affinity to the  
 263 target, according to  $a_i^{\rho_a}$  where  $\rho_a$ , set by default to  $1/2$ , is the sensitivity of B cell activation  
 264 to affinity. This dependency on affinity is to model the increased propensity of the memory

265 cells to activate when presented by helper T cells with familiar antigen. The choice of the  
266 default  $\rho_a = 1/2$  is motivated by the fact that although memory cells with higher binding  
267 strengths to the antigen are more likely to be activated, the interaction between a helper T  
268 cell and a memory B cell is an one-time event, and is thus less sensitive to binding strength.

269 As an example, consider a system with two cell types: L and H, each type with its  
270 own unique sequence (Figure 2b). Assume all cells are activated cells, the number of L and  
271 H are the same at one point in time, and H cells have a higher affinity than L cells by a  
272 factor of  $\rho$ . For ease of exposition, here, we include mutation rate as part of the death rate  
273 because mutation events also decrease cell count. Let's assume the total number of cells  
274 equals the carrying capacity  $C$ . If L and H have the same affinity (i.e.,  $\rho = 1$ ), then the  
275 birth and death rates are identical for all cells. As the affinity of H cells is increased (i.e.,  
276  $\rho > 1$ ), the death rate of L cells increases linearly whereas the death rate of H cells  
277 decreases. Thus, H cells will have higher birth rates than death, will be selected for, and  
278 will expand. If we fix  $\rho = 2$  and increase the population size, the death rates of both L and  
279 H cells increase but at different rates. When the population size is small compared to  $C$ ,  
280 both types of cells have more birth than death. After a threshold ( $C/3$  in this example), the  
281 death rate of L type surpasses its birth rate (thus, its population starts to shrink) while  
282 the population of H cells continues to grow. However, as the population size increases ( $2C/3$   
283 here), both sets of cells start to shrink (i.e., higher death rates than birth).

284

### *Default Models Choices*

285 Several steps of our simulations are flexible and can be changed by the user to  
286 provide reasonable models. We next describe the particular choices we made in our  
287 experiments below, noting that these choices can be changed.

288 *Stopping criteria.* The system enters dormant stage when antigens are neutralized  
289 by the antibodies. A simple way to define neutralization is to switch the stage when the

290 total affinity of antibodies produced by plasma-like cells reach a certain threshold; here, we  
291 switch when the sum of affinities of activated cells ( $\sigma$ ) reaches a predefined constant  $M$ .

*Sequence evolution.* In our experiments, we use an empirical 5-mer-based model inspired by Yaari *et al.* (2013). Let  $s_i^{(p)}$  be the nucleotide on the  $p$ -th position of nucleotide sequence of cell  $i$ . Each  $s_j^{(p)}$  or  $s_k^{(p)}$  is independently set to  $s \in \{A, C, G, T\}$  with probability:

$$Pr(s_j^{(p)} = s) = Pr(s_k^{(p)} = s) = f(s, s_i^{(p-2)}, s_i^{(p-1)}, s_i^{(p)}, s_i^{(p+1)}, s_i^{(p+2)})$$

292 where  $f : \{A, C, G, T\}^6 \rightarrow [0, 1]$  denotes an empirically determined 5-mer frequency model  
293 based on the model of Yaari *et al.* (2013) and recomputed based on newer datasets  
294 including non-synonymous mutations (see details in the supplementary material).

295 *Modelling affinity.* While various methods can be imagined for measuring  
296 closeness of the sequence to the target, we used a simple approach: measuring sequence  
297 similarity according to the BLOSUM matrix and appropriate scaling of numbers. In this  
298 formulation, we assume each amino-acid position contributes to the binding strength to  
299 the target and the sanity of the structure of Ig-receptor independently. Thus, we model  
300 affinity proportionally to the product of the effect of each amino-acid position. This simple  
301 model completely ignores the 3D structure of proteins, but we argue, is sufficient for the  
302 purpose of creating benchmarking datasets.

303 When  $s_i$  includes a stop codon, we simply set  $a_i = 0$ . Otherwise, let  
304  $\xi(s_i) = (\xi_i^{(1)}, \dots, \xi_i^{(L)})$  denote the antibody-coding amino-acid sequence of cell  $i$ . We define  
305 the BLOSUM score of an amino acid sequence  $\xi$  as

$$\Delta_\zeta(\xi) = \sum_{p \in \text{CDR}} (\delta(\xi^{(p)}, \zeta^{(p)}) - \delta(\zeta^{(p)}, \zeta^{(p)})) + w_f \sum_{p \in \{1 \dots L\} \setminus \text{CDR}} (\delta(\xi^{(p)}, \zeta^{(p)}) - \delta(\zeta^{(p)}, \zeta^{(p)})) \quad (2)$$

306 where  $\delta(., .)$  gives the BLOSUM score between two amino acids (Table S1), and  $w_f$  is a  
307 constant used to calibrate the importance of CDRs versus FRs in the affinity and  
308 transformation processes. We then simply set  $f_\zeta(s_i) = \Delta_\zeta(\xi(s_i))$ .

309 *Choosing targets.* Several rounds of target sequences are assumed to be provided  
310 as input, and the extent of the change in targets across rounds impacts the patterns of the  
311 immune response and hence the shape of the clonal trees that result. In our experiments,  
312 to define targets across rounds, we seek a set of sequences with an evolutionary trajectory  
313 that reflects the evolutionary history of a set of real antigen (e.g., influenza virus). Let the  
314 known amino-acid sequences of an antigen sampled through time (flu sequence over  
315 seasons) be denoted by  $\boldsymbol{\eta}_1, \dots, \boldsymbol{\eta}_r$ , and let each sequence have the fixed length  $L_\eta$ . To  
316 choose the targets, we first select an arbitrary naive B cell, here chosen from datasets of  
317 Ellebedy *et al.* (2016), and set  $\hat{\Psi}$  to antibody-coding nucleotide sequence of the variable  
318 region of its heavy chain. Then, we simply set  $\boldsymbol{\zeta}_1$  to the amino-acid translation of  $\hat{\Psi}$ . In  
319 other words, in the first round, we use the naive cell as the target, and therefore, the first  
320 couple of rounds of the simulation should be treated as dummy rounds and should be  
321 discarded. Let  $\kappa$  be a positive constant that controls the rate of change in the target  
322 relative to the rate of change in the antigen sequences. To define the remaining targets, we  
323 seek to find the set of  $r - 1$  sequences that minimize:

$$\sum_{i,j \in [r]} \left| \kappa \sum_{p \in \text{CDR}} \delta(\zeta_i^{(p)}, \zeta_j^{(p)}) - \sum_{q=1}^{L_\eta} (\delta(\eta_i^{(q)}, \eta_i^{(q)}) - \delta(\eta_i^{(q)}, \eta_j^{(q)})) \right|. \quad (3)$$

324 This score simply penalizes a set of targets by the divergence between pairwise sequence  
325 distances of all target sequences across all rounds versus pairwise sequence distances of all  
326 antigen sequences over the same rounds. To account for the presence of conserved regions,  
327 we arbitrarily chose to keep all the non-CDR regions invariable in all target sequences (note  
328 that the chose of invariable sites can be easily changed). Thus, if the score is minimized,  
329 the distance between two target sequences from two rounds would become similar to the  
330 distances of antigen sequences, scaled by a factor of  $\kappa$ . We approach this NP-hard problem  
331 using a greedy search heuristic (Algorithm S3). The heuristic starts with arbitrary  
332  $\boldsymbol{\zeta}_2, \dots, \boldsymbol{\zeta}_r$  and replaces one symbol of one sequence at a time to reduce the objective  
333 function; it repeats until reaching a local minimum where no such replacement is possible.



MATERIAL AND METHODS

*Flu simulations*

*Simulation settings.* We performed several simulations of a series of  $r = 56$  rounds of flu infections, using sequences of hemagglutinin (HA) protein. HA found on the surface of the influenza viruses is the primary target of neutralizing antibodies. High mutation rate of influenza genome changes the sequence of HA and allows the virus to escape from the immune pressure thus making flu recurring seasonal infection. The NCBI Influenza Virus Resource (Bao *et al.*, 2008) contains 961 HA sequences from influenza B virus collected around the world. Each HA sequence is labeled with a year and a location. For simulation purposes, we extracted 59 HA sequences corresponding to flu infections in Hong Kong and selected 56 out of 59 HA sequences that have the same length (584 aa). The selected HA sequences were detected in Hong Kong from 1999 to 2010.

We used the default settings for the various parameters of Table 1, and used the approach described earlier to choose the target amino-acid sequences. Each round corresponds to one season, starts at the infected stage with a given target sequence  $\zeta_t$ , which ends when  $\sigma = M$ . At that point, we assume the infection is overcome and the system switches to dormant, where we stay until the next round starts (times of flu outbreaks are known in our dataset). When the  $r = 56$  rounds of infections end, we sample  $\varsigma = 200$  antibody-coding nucleotide sequences  $\Psi_1, \dots, \Psi_\varsigma$  from cells in the system (i.e., from the round  $r$ ) and built their clonal tree.

Table 3. *Experiment setup*

| Experiment                                   | Controlled parameters | Parameter values                                                                                                                                                                                               | Parameter units                    |
|----------------------------------------------|-----------------------|----------------------------------------------------------------------------------------------------------------------------------------------------------------------------------------------------------------|------------------------------------|
| Selective pressure vs. rate of hypermutation | $A \times \mu$        | (2, 2), (2, 1), (2, 1/2), (2, 1/4), (2, 1/8), (1, 2), (1, 1), (1, 1/2), (1, 1/4), (1, 1/8), (1/2, 1), (1/2, 1/2), (1/2, 1/4), (1/2, 1/8), (1/4, 1), (1/4, 1/2), (1/4, 1/4), (1/4, 1/8), (1/8, 1/4), (1/8, 1/8) | $A : 10^{-1}$ ,<br>$\mu : 10^{-3}$ |
| Framework weight                             | $w_f$                 | 2, 1, 1/2, 1/3, 1/5                                                                                                                                                                                            | 1                                  |
| Germinal center size                         | $C$                   | 4, 2, 1, 1/2, 1/4, 1/8                                                                                                                                                                                         | $10^5$                             |
| Memory cell life                             | $1/\lambda'_d$        | 16, 8, 4, 2, 1, 1/2                                                                                                                                                                                            | year (365 days)                    |

354 *Experiments.* To benchmark reconstruction tools, we set up four experiments,  
355 varying one or two parameters in each experiment (Table 3) and setting the remaining ones  
356 to default values (Table 1). The central experiment contains 19 conditions, changing the  
357 selective pressure ( $A$ ) and the rate of hypermutation ( $\mu$ ). We vary  $A$  from  $1/8\times$  of default  
358 value (0.1) to  $2\times$  and vary  $\mu$  s from  $1.25 \times 10^{-4}$  to  $2 \times 10^{-3}$  per base-pair per generation.  
359 In six combinations, the selective pressure is not high enough to overcome random  
360 mutations; in these cases, the affinity values do not increase and as a result, the carrying  
361 capacity is never reached. Thus, we exclude these conditions. We also study three other  
362 parameters. We vary the weight multiplier of FRs ( $w_f$ ) from  $1/5$  to 2. We vary the carrying  
363 capacity ( $C$ ), which is the germinal center size or the amount of antigens FDCs hold in the  
364 context of B cell maturation, from 12500 to 400000. The value of this parameter can  
365 impact the speed of novel mutations arising and may change the properties of simulated  
366 trees. We also vary the mean life-time of memory cells from 0.5 year to 16 years, to study  
367 the impact of the extent of memory cell activation during recurrent infections.

### 368 *Methods of Clonal Lineage Reconstruction*

369 *MST(-like) methods.* We implemented a simple minimum spanning tree method in  
370 the following way. We let the vertices of the graph to correspond to  $\Psi_1, \dots, \Psi_\zeta$  as well as  
371  $\hat{\Psi}$ . For each pair of vertices, we let the distance between them to be the Hamming distance  
372 between corresponding nucleotide distance. We then find the minimum spanning tree  
373 (MST) of the graph and root the resulting tree at the vertex corresponding to  $\hat{\Psi}$ .

374 Besides MST, we also ran reconstruction using Immunitree Sok *et al.* (2013b), a  
375 tool that clusters antibody-coding sequences into lineages and builds clonal trees at the  
376 same time by optimizing a minimum spanning tree and Steiner tree-like problem. We took  
377 as input  $\Psi_1, \dots, \Psi_\zeta$  and used Immunitree to build a set of clonal trees. We then added  
378 vertex  $\hat{\Psi}$  as the root and let the roots of the clonal trees to be immediate children of  $\hat{\Psi}$ .

379 *Brilia* clusters antibody-coding sequences into lineages and builds clonal trees at  
380 the same time. We took as input  $\Psi_1, \dots, \Psi_\zeta$  and used *Brilia* to build a set of clonal trees.  
381 We then added vertex  $\hat{\Psi}$  as the root and added roots of the clonal trees as children of  $\hat{\Psi}$ .

382 *Phylogenetic methods.* We tested ML based phylogenetic reconstruction using on  
383 RAxML under GTR model and IgPhyML, a ML method tuned specifically for immune  
384 cells. For RAxML, we took as input  $\Psi_1, \dots, \Psi_\zeta$  as well as  $\hat{\Psi}$  to obtain an unrooted  
385 phylogenetic tree and reroot at  $\hat{\Psi}$ . For IgPhyML, we took as input  $\Psi_1, \dots, \Psi_\zeta$  and provided  
386  $\hat{\Psi}$  as root to obtain a rooted phylogenetic tree. Both methods produce fully binary trees.

387 *Zero-aware phylogenetic methods.* Since the length of each antibody-coding  
388 nucleotide sequence  $3L < 400$ , it is reasonable to assume that both ends of any branch  
389 with length less than  $10^{-4}$  would correspond to the same sequence (if it was sampled).  
390 Therefore, we slightly modified RAxML and IgPhyML by contracting branches of length  
391 less than  $10^{-4}$  and we call the new methods RAxML\* and IgPhyML\* respectively.

## 392 *Evaluation Framework*

393 *Notations.* The simulated and reconstructed histories of samples  $\Psi_1, \dots, \Psi_\zeta$  are  
394 represented as trees where samples are uniquely labeled on some nodes and the remaining  
395 nodes are left unlabelled. For a rooted tree  $T$ , we let  $\mathbf{L}_T$  be the set of leaves and  $\mathbf{I}_T$  be the  
396 set of internal nodes. For each node  $v$  of  $T$ , let  $\mathcal{C}(v)$  be the set of its children. We define  
397  $\phi(v)$  as the set of node labels of labeled nodes below  $v$ . Also, for any *set* of nodes  $V$ , we  
398 define  $\phi(V) = \{\phi(v) : \phi(v) \neq \emptyset, v \in V\}$  and  $\phi(T) = \phi(\mathbf{I}_T \cup \mathbf{L}_T)$ .

399 *Characterizing a clonal tree.* We define a set of metrics for characterizing  
400 properties of simulated trees in terms of their topology, branch length, and distribution of  
401 labelled nodes (Table 4). Some of these metrics are motivated by similar ones on  
402 phylogenetic trees but are adjusted to allow sampled internal nodes and multifurcations.

Table 4. *Properties of a clonal tree T.*

| Property                     | Definition                                                                                                                                                                                                        |
|------------------------------|-------------------------------------------------------------------------------------------------------------------------------------------------------------------------------------------------------------------|
| Internal sample (%)          | The percentage of labeled nodes in set $\mathbf{I}_T$ .                                                                                                                                                           |
| Bifurcation index            | Defined as $\frac{ \mathbf{I}_T }{ \mathbf{L}_T -1}$ equals 1 for bifurcating trees and $\approx 0$ for the star tree.                                                                                            |
| Sample depth                 | The average depth of labeled nodes in $T$ .                                                                                                                                                                       |
| Balance (cherry)             | Half the sum over all leaves of the fraction of their siblings that are also leaves.<br>$\sum_{v \in \mathbf{I}_T} \binom{ \mathcal{C}(v) \cap \mathbf{L}_T }{2} / ( \mathcal{C}(v)  - 1)$ where $0/0 \doteq 1/2$ |
| Single mutation branches (%) | The percentage of branches with length one.                                                                                                                                                                       |
| Accumulated mutations (avg)  | The average depth (path length to the root) of all labeled nodes of tree $T$ .                                                                                                                                    |
| Accumulated mutations (sum)  | The summation of branch lengths of all branches of tree $T$ .                                                                                                                                                     |
| Mutations per branch         | The average branch length of tree $T$ .                                                                                                                                                                           |

The last four metrics require branch length (in mutation unit) on the tree.

Table 5. *Metrics for comparing the reference simulated tree R to estimated tree E.*

| Metric                            | AB   | Definition                                                                                                                                                                                                |
|-----------------------------------|------|-----------------------------------------------------------------------------------------------------------------------------------------------------------------------------------------------------------|
| False Discovery Rate              | FDR  | $ \phi(E) \setminus \phi(R)  /  \phi(E) $                                                                                                                                                                 |
| FDR no singletons                 | FDR* | $ \phi(\mathbf{I}_E) \setminus \phi(\mathbf{I}_R)  /  \phi(\mathbf{I}_E) $                                                                                                                                |
| False Negative Rate               | FNR  | $ \phi(R) \setminus \phi(E)  /  \phi(R) $                                                                                                                                                                 |
| FNR no singletons                 | FNR* | $ \phi(\mathbf{I}_R) \setminus \phi(\mathbf{I}_E)  /  \phi(\mathbf{I}_R) $                                                                                                                                |
| RF cluster distance               | RF   | $ \phi(R) \cup \phi(E)  -  \phi(R) \cap \phi(E) $                                                                                                                                                         |
| RF cluster distance no singletons | RF*  | $ \phi(\mathbf{I}_R) \cup \phi(\mathbf{I}_E)  -  \phi(\mathbf{I}_R) \cap \phi(\mathbf{I}_E) $                                                                                                             |
| Triplet discordance               | TD   | $ \{\Phi : \phi(R) \upharpoonright \Phi \neq \phi(E) \upharpoonright \Phi, \Phi \subset \{\Psi_1, \dots, \Psi_\zeta\},  \Phi  = 3\} $                                                                     |
| Triplet edit distance             | TED  | $\sum_{\Phi \subset \{\Psi_1, \dots, \Psi_\zeta\},  \Phi =3}  (\phi(R) \upharpoonright \Phi) \cup (\phi(E) \upharpoonright \Phi)  -  (\phi(R) \upharpoonright \Phi) \cap (\phi(E) \upharpoonright \Phi) $ |
| MRCAs Discordance                 | MD   | $\sum_{i,j \in [s]}  \mathbf{U}_R(i,j) - \mathbf{U}_E(i,j) $                                                                                                                                              |
| Patristic Distance                | PD   | $1/2 \sum_{i,j \in [s]}  \mathbf{U}_R(i,j) + \mathbf{U}_R(j,i) - \mathbf{U}_E(i,j) - \mathbf{U}_E(j,i) $                                                                                                  |

For a set of nodes  $V$  and a set of labels  $\Phi$ ,  $\phi(V) \upharpoonright \Phi = \{\Phi' \cap \Phi : \Phi' \cap \Phi \neq \emptyset, \Phi' \in \phi(V)\}$ . For labeled nodes  $\Psi_i$  and  $\Psi_j$ , let  $\mathbf{U}_T(i,j)$  be the number of edges between the node  $\Psi_i$  in  $T$  and the the MRCA of  $\Psi_i$  and  $\Psi_j$  in  $T$ .

403 For example, to measure tree balance, we extend the definition of the number of cherries  
 404 but allow modifications (our definition reduces to the traditional definition when the tree is  
 405 binary). Other metrics (e.g., percent internal samples) are only meaningful for clonal trees  
 406 and are meant to quantify the deviation of a clonal tree from phylogenetic trees.

407 *Comparing trees.* Many metrics exist for comparing phylogenetic trees. However,  
 408 in the presence of polytomies and sampled ancestral nodes, the classic metrics need to be  
 409 amended. Here, we generalize several existing metrics and introduce new ones. All metrics  
 410 are defined over a simulated tree  $R$  and a reconstructed tree  $E$ , both induced down to  
 411 include all labeled nodes (i.e., removing unlabelled nodes if less than two of their children  
 412 have any labelled descendants). See Table 5 for precise definitions of metrics.

413 *RF-related.* We define False Discovery Rate (FDR) as the percentage of clusters in  $E$  that  
414 are not in  $R$ , False Negative Rate (FNR) as the percentage of clusters in  $R$  that are not in  
415  $E$ , and Robinson-Foulds cluster distance (RF) as the number of clusters in either but not  
416 both trees. Note that unlike traditional Robinson and Foulds (1981) distance, here,  
417 internal nodes can also have labels, and we define the metric based on clusters in a rooted  
418 tree instead of bipartitions in an unrooted tree. Moreover, the singleton clusters are trivial  
419 when all labeled nodes are leaves; however, when there are labeled internal nodes,  
420 including or excluding singletons can make a difference. Thus, we also define FPR FNR,  
421 and RF distance when excluding singleton clusters.

422 *Triplet-based.* We define *triplet discordance* (TD) as the number of trees induced by  
423 triples of *labeled* nodes (leaf or internal) where the topology in the simulated tree and the  
424 reconstructed tree differ. We define the *triplet edit distance* (TED) as the summation over  
425 all triplets of the labeled nodes of cluster RF distance between the two trees induced to the  
426 triplet. Intuitively, it is the sum of the minimum number of branch contractions and  
427 resolutions required to convert a triplet in  $R$  to a triplet in  $E$ , summed over all triplet.

428 *Path discordance.* Patristic discordance for a pair of labelled nodes  $\Psi_i$  and  $\Psi_j$  is defined as  
429 the difference between the number of branches in the path between  $\Psi_i$  and  $\Psi_j$  on two trees  
430  $R$  and  $E$ . The patristic discordance (PD) between  $R$  and  $E$  is the summation of the  
431 Patristic discordance over all pairs of labelled nodes (intern or leaf). We define the MRCA  
432 discordance for an ordered pair of labelled nodes  $\Psi_i$  and  $\Psi_j$  as the difference between the  
433 number of branches in the path between  $\Psi_i$  and its MRCA with  $\Psi_j$  when computed from  
434 trees  $R$  and  $E$ . The MRCA discordance (MD) between the two trees is the summation of  
435 MRCA discordance over all ordered pairs of labeled nodes.

436 The FNR and FDR metrics are already normalized. To normalize other metrics, for  
437 each experimental condition, we create a control tree by randomly permuting labels of the  
438 true tree. We then normalize scores (other than FNR and FDR) of a reconstruction

439 method by dividing it by the average score of replicates of the control method.

440 Computing FNR, FDR, and RF metrics takes  $O(\varsigma)$  time with hashing and  
441 randomization (algorithm S4). Triplet-based metric can be easily computed in  $O(\varsigma^3)$  time  
442 with simple preprocessing and iterating over all triplets. Both PD and MD take  $O(\varsigma^2)$  time  
443 with preprocessing that computes distances to MRCA.

## 444 RESULTS

### 445 *Demonstration of the simulation process*

446 Visualizing one replicate of simulation under default condition, we see patterns of  
447 average affinity and the number of activated and memory cells that rise and fall as time  
448 progress during the infected stage (Fig. 3a). During each round of infection, the affinity  
449 first decreases and then increases as long as the duration of the infection is long enough.  
450 This pattern agrees with biological expectations: when the number of activated cells is low  
451 and the selective pressure is low, a mutation is likely to lead to reduced affinity, whereas,  
452 when the number of activated cells increases, the selective pressure begins to increase and  
453 select for higher affinity. The duration of infections, the mean affinity at the end, and the  
454 total number of cells also varies widely across different seasons. When the affinity at the  
455 start of a season is low, the duration of infection is longer and more activated cells and  
456 memory cells are generated (Figs. 3a and S1a). This pattern is also consistent with the  
457 biological expectation: when the immune system already has high affinity to the antigen, it  
458 can eradicate the antigen quickly and without much need for further evolution. To further  
459 quantify the pattern, we define the novelty of each target  $\zeta_i$  as the negation of the  
460 maximum BLOSUM score between that target and any previous target:  $-\max_{j < i} \{\Delta_{\zeta_i}(\zeta_j)\}$ .  
461 We observe that as novelty of the target increases, the average affinity of activated cells at  
462 the end of the infection tends to decrease ( $R^2 = 0.242$ ,  $p = 2.5 \times 10^{-4}$ ), whereas, the  
463 number of activated cells at the end of the infection ( $R^2 = 0.248$ ,  $p = 2.0 \times 10^{-4}$ ) and the  
464 duration of infection ( $R^2 = 0.288$ ,  $p = 4.8 \times 10^{-5}$ ) both tend to increase (Fig. 3b).

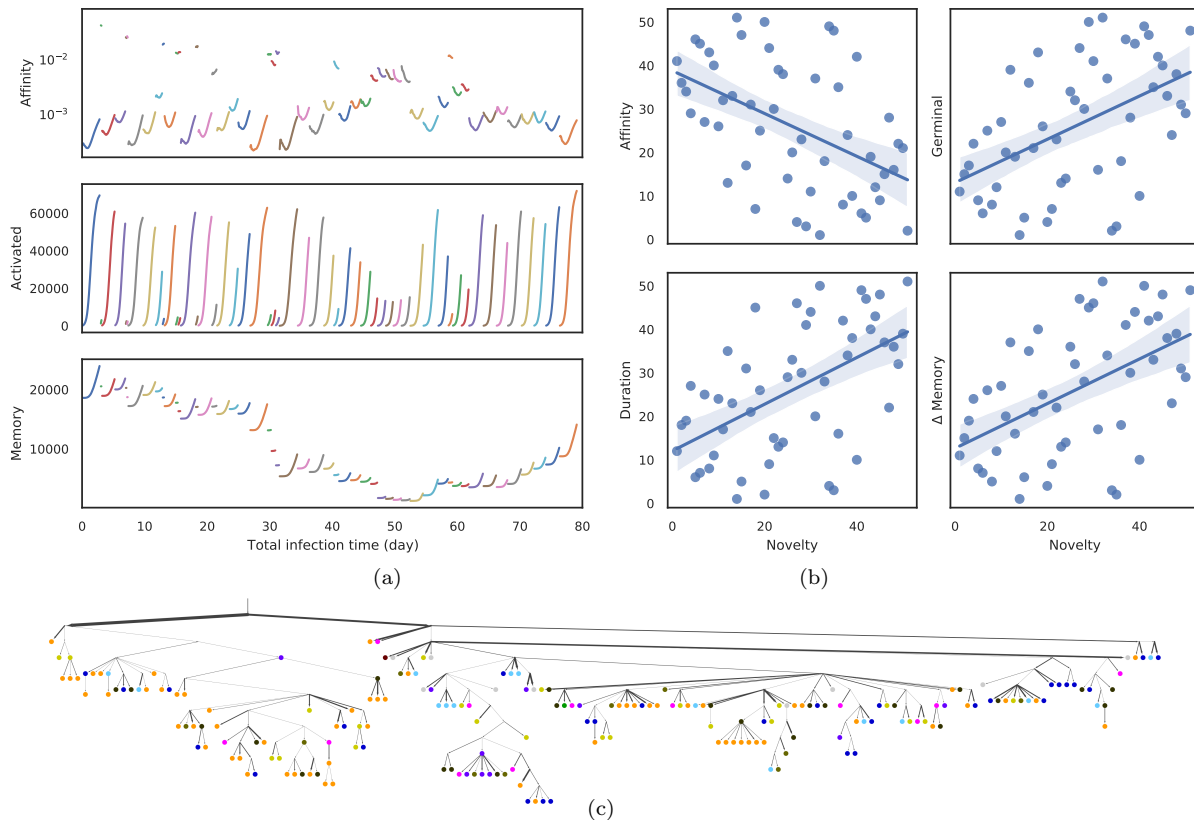

Fig. 3. a) Average affinity of activated cells to current infection target (log scale), the number of activated cells, and the number of memory cells by total time in infected stage across the last 51 stages of infection (colors) each corresponding to one flu season (discarding the first 5 rounds and dormant stages). b) Impact of the novelty of the antigen on the outcome of the infection across the 56 seasons simulated. The novelty of seasons is measured by  $-\max_{j < i} \{\Delta \zeta_i(\zeta_j)\}$  and is ranked from less novel to more novel on the x axis. Y-axis shows ranking (from low to high) of average affinity of activated cells to current infection target ( $R^2 = 0.242$ ,  $p = 2.5 \times 10^{-4}$ ) at the end of the infection, the number of activated cells ( $R^2 = 0.248$ ,  $p = 2.0 \times 10^{-4}$ ) at the end of the infection, the duration of infection ( $R^2 = 0.288$ ,  $p = 4.8 \times 10^{-5}$ ), and the change in memory cell count ( $R^2 = 0.264$ ,  $p = 1.2 \times 10^{-4}$ ) from the start to the end of the infection. c) Clonal tree of memory cells sampled from one simulation under default condition after all 56 seasons. Nodes are colored by seasons when the memory cells emerge (grey for season 1 through 46; as part (a) for others). Here, 17 internal nodes are sampled and are indicated as circles. Edge weights denote the number of mutations of sequences denoted by adjacent nodes. See Figure S1 for more.

465 Memory cells counts fluctuate. Each season leads to a buildup in memory cells from  
 466 the start to the end of the infection, and the amount of buildup depends on the duration  
 467 and correlates with novelty ( $R^2 = 0.264$ ,  $p = 1.2 \times 10^{-4}$ ). However, the total number of  
 468 memory cells reduces between seasons due to cell deaths (Fig. S1c) and changes across  
 469 seasons. In particular, a string of short-lived infections and large time spans between the  
 470 flu seasons between 2002 and 2008 gradually lead to a depletion of the memory cells, which  
 471 are then built up again in the subsequent seasons (Fig. S1c).

24

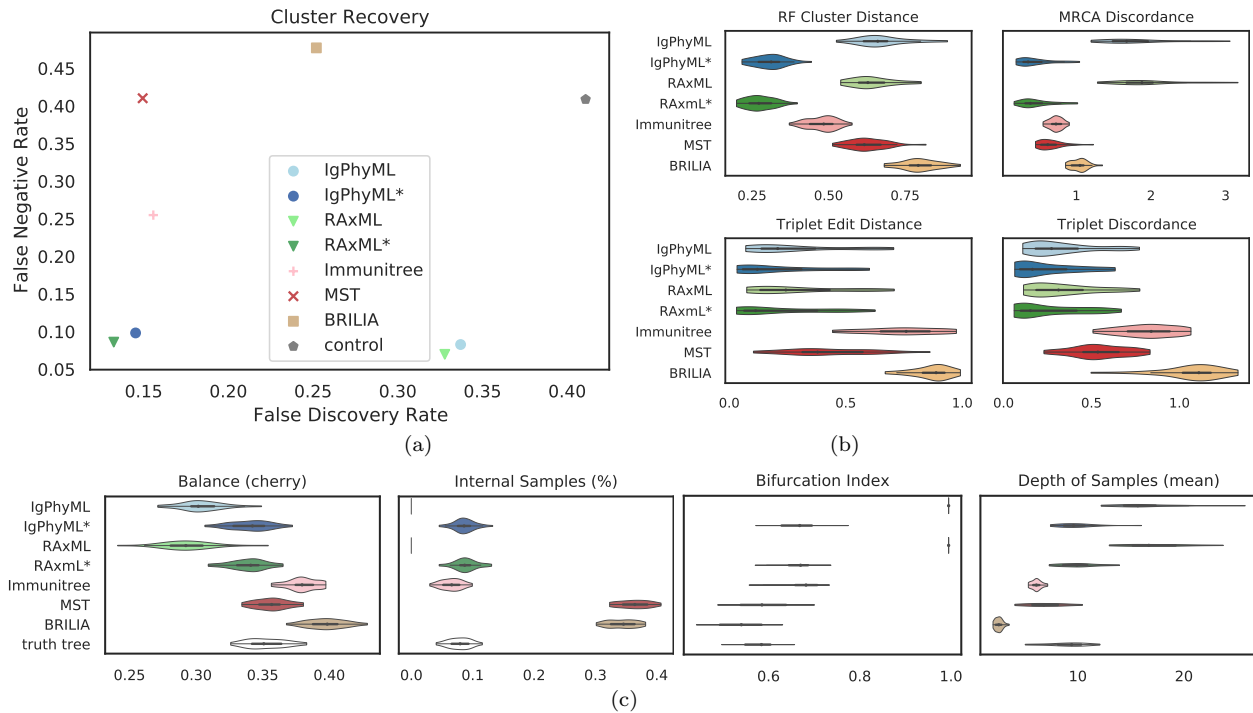

Fig. 4. (a) False Discovery Rate (FDR) and False Negative Rate (FNR) of various reconstruction methods on simulations under default conditions; (b) Normalized Robinson-Foulds cluster distance (RF), MRCA discordance (MD), triplet edit distance (TED), and triplet discordance (TD). (c) Properties of the estimated and true trees. For results excluding singletons and the PD metric, see Fig. S2.

### Benchmarking reconstruction methods

472 *Default Parameters.* Under default parameters, over all evaluation metrics,  
 473 zero-aware Phylogenetic methods (IgPhyML\* and RAxML\*) clearly have the best  
 474 accuracy in reconstructing the lineage history (Fig. 4). The normal Phylogenetic methods  
 475 (IgPhyML and RAxML), which produce fully binary trees with no samples at leaves, have  
 476 the lowest FNR error, retrieving more than 90% of the correct clusters. However, their  
 477 precision is predictably low: close to 35% of their clusters are incorrect. Interestingly,  
 478 zero-aware phylogenetic methods have only a slight increase in FN rate (< 2% on average)  
 479 but enjoy a dramatic improvement in precision. By simply contracting super-short  
 480 branches, the FDR error reduces to less than 15%, which is better than all other methods.  
 481 Similarly, normal phylogenetic methods perform poorly according to RF, PD, and MD  
 482 metrics, which emphasize false positives, but perform well (but not as well as the  
 483



484 zero-aware versions) according to triplet-based metrics (TED and TD), which penalize  
485 false negatives more than false positives. Among the two phylogenetic reconstruction  
486 methods, RAxML is slightly more accurate than IgPhyML.

487 The MST-like methods have low FDR, coming close to zero-aware phylogeny-aware  
488 methods, but also have much higher FNR (25% or more). Immunitree (which uses Steiner  
489 trees) is substantially better than a simple MST in terms of FNR, but not in terms of  
490 FDR or triplet-based measures. These patterns largely follow the expectations: more  
491 resolved trees have lower FNRs whereas less resolved trees have lower FDRs. However,  
492 zero-aware phylogeny methods are able to obtain the best FDR and FNR and dominate  
493 other methods. BRILIA consistently has high error in our analyses. These patterns remain  
494 largely similar (but are magnified) when singletons are removed from the consideration  
495 (Fig. S2). The main exception is that when singletons are excluded, Immunitree is no  
496 longer the second best method according to the RF distance.

497 We next compare properties of the inferred trees and true trees (Figure 4c).  
498 BRILIA and MST put far too many labels at internal nodes ( $\approx 35\%$  instead of  $\approx 8\%$ ), while  
499 Immunitree and zero-aware phylogenetic trees are very close to the true tree in terms of  
500 percent internal samples. BRILIA and Immunitree over-estimate the tree balance, while  
501 phylogenetic trees under-estimate balance, especially before contracting low support  
502 branches. Conversely, phylogenetic methods over-estimate depth of samples while BRILIA,  
503 MST, and Immunitree underestimate the depth; zero-aware phylogenetic methods,  
504 however, produce trees that are very close to the true tree in sample depth. Phylogenetic  
505 methods, by definition, overestimate bifurcation index as 1; this overestimation is  
506 dramatically reduced but not fully eliminated by zero-aware phylogenetic methods and  
507 Immunitree. MST is quite close to the correct levels of bifurcation.

508 *Varying selective pressure.* The reconstructions methods are all impacted as  
509 selective pressure ( $A$ ) changes, but some methods are more sensitive than others, and they  
510 are affected differently (Figs. 5ab). Zero-aware phylogenetic methods have the best

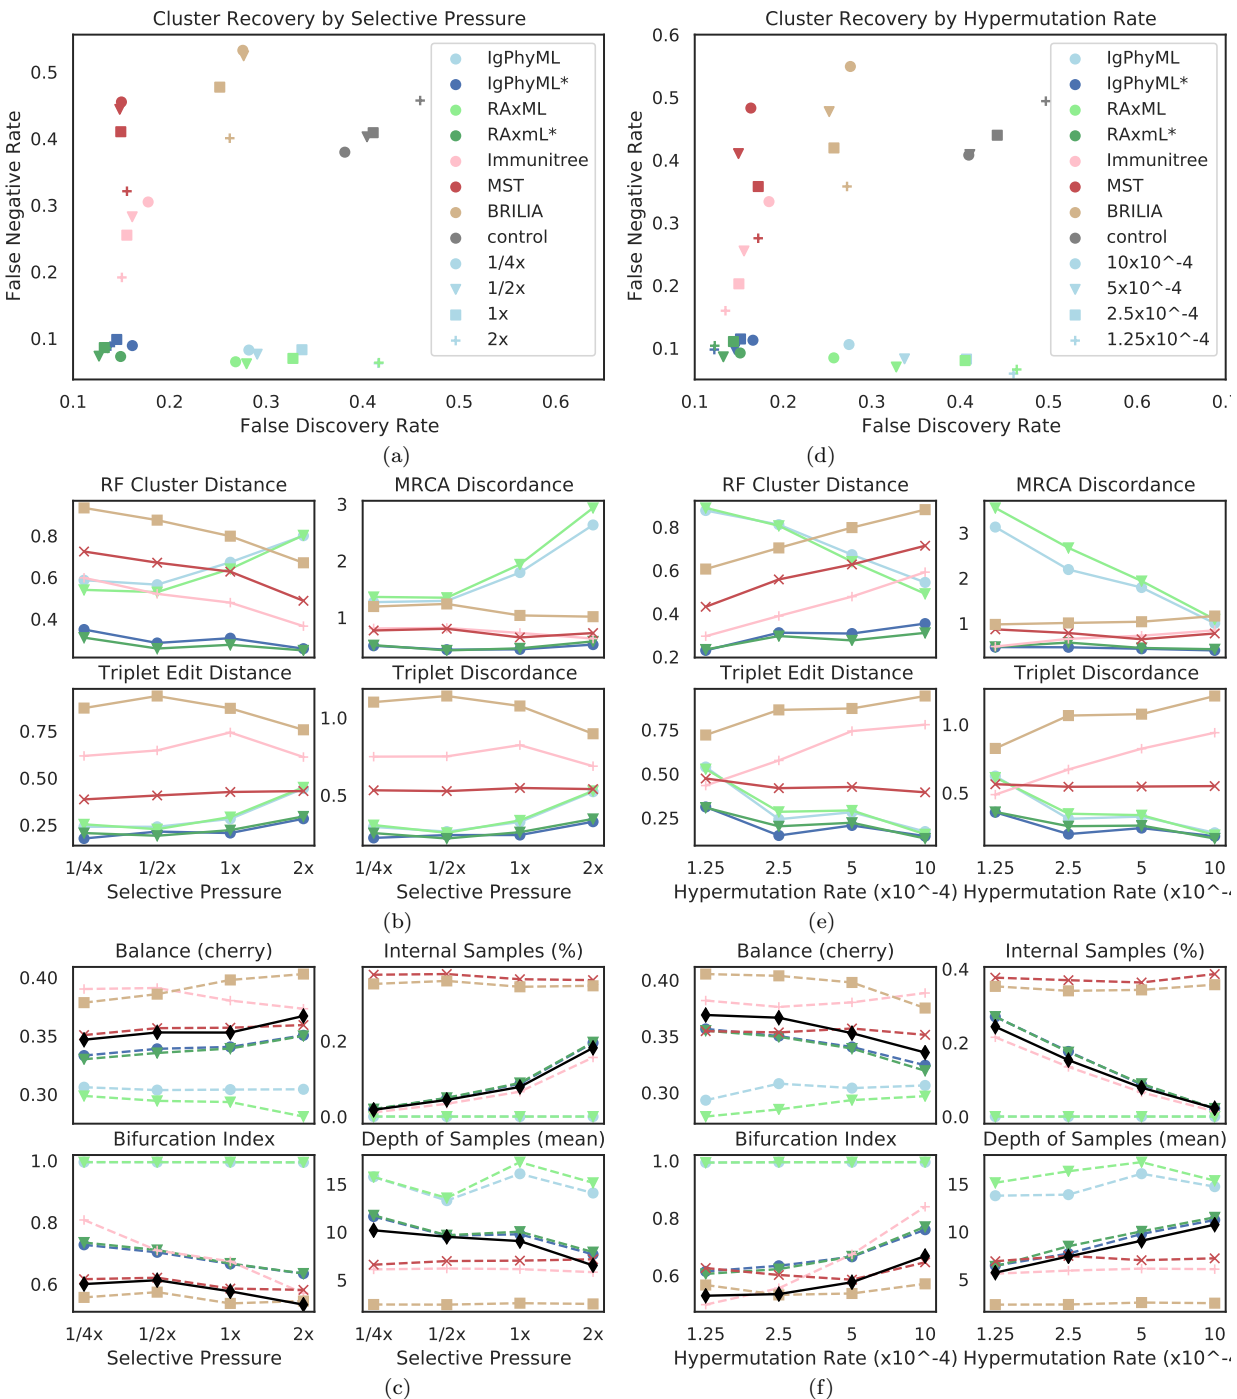

Fig. 5. Impact of selective pressure  $A$  (a-c) and mutation rate  $\mu$  (d-f) on tree inference error (a,b,d,e) and tree properties (c,f). We measure tree error by FDR and FNR (a,d), Robinson-Foulds cluster distance (RF), MRCA discorance (MD), triplet edit distance (TED), and triplet discorance (TD) (b,e). We show properties of true (black) and reconstructed trees (c,g).  $\mu = 5 \times 10^{-5}$  in (a-c) and  $A = 0.1$  in (d-f), which are all default values.

511 accuracy across values of  $A$ . The ranking among other methods depends on the selective  
512 pressure such that phylogenetic methods become the worst when  $A$  is high and become the  
513 best when  $A$  is low. As  $A$  increases, error tends to increase for phylogenetic methods under  
514 all evaluation metrics except for the FNR; for example, the FDR of RAxML increases from  
515 27% at the  $1/4x$  level to 42% at the  $2x$  level. In contrast, the error of Immunitree, MST,  
516 and BRILIA reduces with increased  $A$  according to FNR and RF. Zero-aware phylogenetic  
517 methods are relatively robust to the  $A$  and their error rates change only slightly across  
518 conditions. When singletons are removed from the metrics of comparison, patterns remain  
519 similar, though the impact of selective pressure becomes less pronounced (Fig. S3a).

520 The reason behind these patterns becomes more apparent once we consider changes  
521 in tree properties (Figs. 5c). As  $A$  increases, the fraction of internal samples tends to  
522 increase. This pattern can be explained: when selective pressure is high, cells with low  
523 affinity die off quickly, which results in shorter branch lengths. Since phylogenetic methods  
524 cannot put sequences on internal nodes, they have reduced accuracy. In contrast,  
525 IgPhyML\*, RAxML\*, and Immunitree are able to successfully assign sequences to internal  
526 branches; as a result, their percentage of internal samples match those of the true trees  
527 (Figs. 5c). Similarly, with increased  $A$ , the bifurcation index of the simulated tree tends to  
528 decrease, a pattern that is observed also in reconstructed trees from IgPhyML\*, RAxML\*,  
529 Immunitree, MST, and BRILIA. Again, phylogenetic trees, which produce binary trees, are  
530 unable to capture these patterns. As  $A$  increases, depth of sampled nodes of the simulated  
531 tree tends to decrease, a pattern matched by IgPhyML\* and RAxML\* but not other  
532 methods. Finally, when  $A$  is high, trees are shorter (i.e., accumulate less mutations) and  
533 more branches are single mutation (Fig. S4), both of which make phylogenetic inference  
534 more difficult. The reduced levels of depth, total change, and bifurcation make sense:  
535 higher pressure should result in fewer mutations needed to reach  $M$  because cells with  
536 unfavorable mutations are less likely to survive; this would produce shorter trees.

28

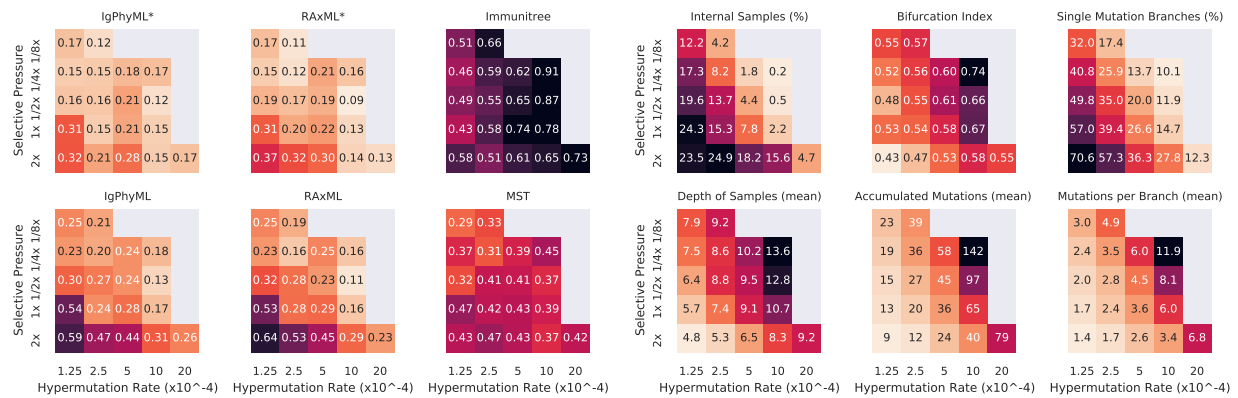

Fig. 6. For varying levels of selective pressure ( $A$ ), rate of hypermutation ( $\mu$ ), and all reconstruction methods except BRILIA, we show tree error measured by the triplet edit distance TED (left) and properties of the true tree (right). When the mutation rate is too high and selection pressure is too low, the simulation never ends, meaning that the total affinity needed to overcome the antigen is never reached; these conditions are missing from the figure. For other evaluation criteria see S5.

537 *Varying rate of hypermutation.* As the hypermutation rate ( $\mu$ ) increases, error  
 538 decreases for normal Phylogenetic methods (IgPhyML and RAxML) according to most  
 539 metrics but stays relatively stable for zero-aware methods (Fig. 5de). Increasing  $\mu$  results  
 540 in simulated trees that are marginally less balanced, are more bifurcating, have fewer  
 541 internal node samples, and have a higher depth for sampled nodes (Fig. 5f). Thus,  
 542 increasing  $\mu$  generates trees more similar to what traditional phylogenetic methods  
 543 assume. Zero-aware phylogenetic methods and Immunitree designate the right percentage  
 544 of nodes as internal, but both are slightly more bifurcating than true trees (Fig. 5f).  
 545 Overall, zero-aware phylogenetic methods are the most accurate across all values of  $\mu$ .

546 *Interplay between selective pressure and mutation rate.* When we vary both  $A$  and  
 547  $\mu$ , we observe that increasing mutation rate has similar effects on the error and tree  
 548 properties as decreasing the selective pressure (Fig. 6). Reassuringly, error patterns  
 549 observed when fixing one variable and changing the other are consistent with patterns  
 550 when both variables are changed (Figs. 6 and S5). The most difficult condition for  
 551 phylogenetic methods is low mutation rate and high selective pressure, where close to 70%  
 552 of the branches include only a single mutation and bifurcation index is only 43%. However,

553 zero-aware methods are impacted less in these conditions, and are in fact improved  
554 according to the RF metric (Fig. S5). In addition, we observe that antibody clonal trees  
555 become more phylogenetic-like – that is, more bifurcating (max: 0.74) and fewer internal  
556 samples (min: 20%) – with  $\mu = 10^{-3}$  and  $A = 1/4x$ . Increasing the mutation rate or  
557 decreasing the selective pressure beyond these values leads to combinations where the  
558 infection could not be overcome.

559 *Other parameters.* Beyond the main two parameters, we also studied changing six  
560 secondary parameters, most of which had relatively little impact on the results (Fig 7). As  
561 the weight of FRs regions in computing affinity ( $w_f$ ) increases, error tends to *slightly*  
562 increase for all methods under many evaluation metrics (Fig. S6). This pattern can be  
563 related to the slight increase in the number of single branch mutations and the reduction  
564 in the total number of substitutions across the tree. As germinal center capacity ( $C$ )  
565 increases, error increases or decreases slightly, depending on what measure is examined  
566 (Fig. S7). Increasing  $C$  tends to reduce internal samples of the simulated tree and single  
567 mutation branch and tends to increase mutations per branch. As memory cell life-time  
568 ( $1/\lambda'_d$ ) increases, error tends to increase for phylogenetic methods (Fig. S8), including  
569 IgPhyML\* and RAxML\*, which nevertheless continue to be the best methods. Plasma  
570 cells conversion rate ( $\rho_p$ ) (Fig. S9), rate of change in antibody target compared to antigen  
571 change ( $\kappa$ ) (Fig. S10), and the threshold of total affinity for neutralization and stage  
572 change ( $M$ ) (Fig. S11) have small and inconsistent impacts on tree inference error. In all  
573 conditions examined, IgPhyML\* and RAxML\* have the best accuracy (Fig 7).

574

## DISCUSSION

575

### *Implications for reconstructing antibody evolution*

576

577

Our study partially confirms that phylogenetic methods need to change for inferring antibody clonal trees with high accuracy. Depending on the simulation condition, 1% to

30

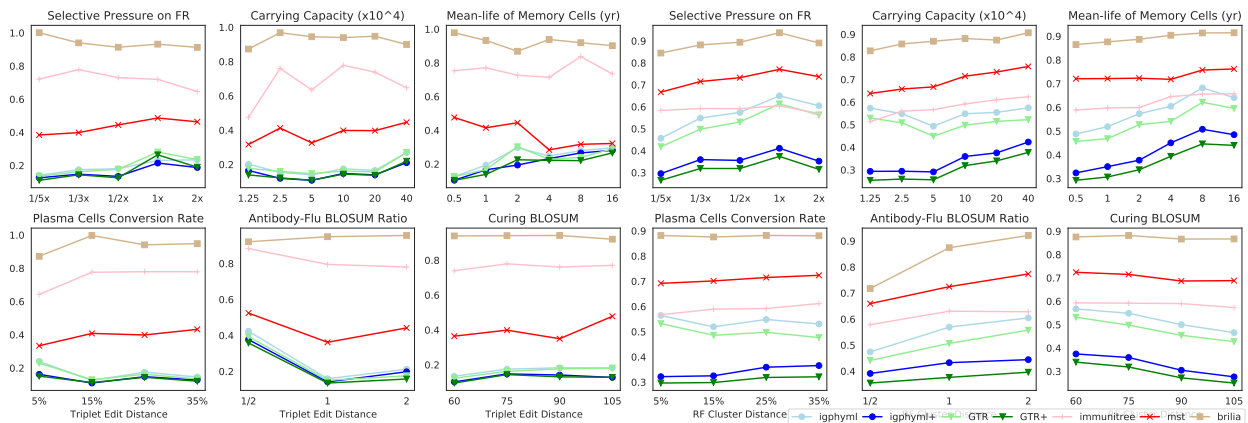

Fig. 7. a) Triple edit distances and b) RF cluster distances by selective pressure on framework region, carrying capacity, mean-life of memory cells, plasma cell conversion rate, antibody-flu blosum ratio (MARatio), stage change threshold (M).

578 20% of sampled sequences belonged to internal nodes, and the true trees are only 60% to  
 579 70% bifurcating. We observed that results of phylogenetic inference using ML, taken at  
 580 face value, can have low accuracy. However, we also showed that ML phylogenetic  
 581 methods, with a very simple adjustment, can outperform the alternative methods based on  
 582 Steiner trees and spanning trees. The simple adjustment we applied was to contract  
 583 branches with length lower than a fixed constant. We selected this constant using a  
 584 rule-of-thumb based on the length of the sequences; however, statistical tests of whether a  
 585 zero branch length null hypothesis can be rejected exist (Jackman *et al.*, 1999; Walsh  
 586 *et al.*, 1999; Goldman *et al.*, 2000) and are fast (Anisimova *et al.*, 2006) and could be used  
 587 *in lieu* of our simple heuristic. Moreover, our work implies that phylogenetic methods that  
 588 try to naturally model zero branch length (e.g., Lewis *et al.*, 2005) are also promising. In  
 589 particular, the adaptive LASSO method of Zhang *et al.* (2020) seems suitable for inferring  
 590 antibody evolution and should be put to test once available as part of a software package.

591 Despite the higher accuracy of zero-aware phylogenetic methods compared to the  
 592 available alternatives, we note that there is still substantial error. Under the default  
 593 condition, 90% of clusters of the true tree were recovered but about 15% of the recovered  
 594 clusters were incorrect. In particular, the discrepancy between FNR and FDR is due to the  
 595 fact that the inferred trees are somewhat more bifurcating than true trees (e.g.,  $\approx 70\%$

596 versus 60% in the default condition). Thus, while contracting some super-short branches  
597 has been helpful in increasing accuracy, our zero-aware phylogenetic trees are still biased  
598 towards too much resolution. It is possible that better Steiner-based methods that  
599 incorporate more advanced models of sequence evolution can solve this shortcoming.

### 600 *Implications for evaluation criteria*

601 The ranking of reconstruction methods can change based on which of the ten  
602 evaluation criteria we choose, and these rankings only partially correlate (Fig. S12). Most  
603 interestingly, FDR and FNR are weakly *anti*-correlated (mean Spearman's rank correlation  
604 coefficient across all tests  $\rho = -0.12$ ), though excluding singletons changes this patterns.  
605 Thus, false positive and false negative errors can a paint contradictory picture, especially  
606 when singletons are included. RF distance, which combines both aspects, correlates  
607 moderately with both FDR ( $\rho = 0.5$ ) and FNR ( $\rho = 0.57$ ). The triplet-based metrics  
608 strongly agree with each other ( $\rho = 0.97$ ) and are mostly compatible with the RF distance  
609 ( $\rho \approx 0.75$ ), but are less similar to MD and PD metrics ( $\rho \leq 0.52$ ). Consistent with the  
610 observation that triplet metrics penalize false negatives more than false positives, they  
611 agree more strongly with FNR than FDR ( $\rho = 0.65$  vs  $0.26$ ). MD and PD are very similar  
612 to each other ( $\rho = 0.96$ ), have no correlation to FNR ( $\rho \leq 0.05$ ), but have moderately high  
613 correlation to FDR ( $\rho = 0.71$ ). Finally, we notice that singletons can matter: while FNR  
614 and FNR\* are highly correlated ( $\rho = 0.94$ ), RF correlates with RF\* less strongly  
615 ( $\rho = 0.71$ ), and FDR correlates with FDR\* only moderately ( $\rho = 0.61$ ).

616 The choice of the metric should depend on downstream application of the clonal  
617 tree. While zero-aware phylogenetic methods are judged to be dramatically better than  
618 normal phylogenetic methods based on most criteria, they are only slightly better  
619 according to the triplet-based criteria. The triplet metrics do not penalize trees heavily if  
620 they are more resolved than the true tree or if they move internal nodes to leaves. Thus,  
621 when downstream usage is robust to extra resolution and extra terminal edges, triplet

622 metrics offer a good way to measure topological accuracy. On the other extreme, PD and  
623 MD are very sensitive to the tree resolution and internal placement, so much so that they  
624 often evaluate inferred phylogenetic trees to be much worse than random trees (Fig. S5)  
625 because these trees generate fully resolved trees and put samples at leaves. Thus, we don't  
626 find PD and MD to be reliable metrics of *topological* accuracy. RF distance is in between:  
627 it penalizes extra resolution more than triplet metrics but less than path-based metrics. It  
628 does distinguish zero-aware and phylogenetic methods but rarely evaluates any methods to  
629 be worse than random (Fig. S5). Overall, dividing the observed error along two  
630 (potentially contradictory) axes such as FNR and FDR is recommended because this  
631 evaluation provides more insight into reasons behind error.

### 632 *Comparison to outer simulation models*

633 Several simulation tools capable of benchmarking reconstruction methods have been  
634 recently developed. Some of these tools are not comparable to our effort because of various  
635 limitations. The recent immuneSIM by Weber *et al.* (2020) generates mutations but does  
636 not model the clonal tree or the selection process. Methods of Amitai *et al.* (2017) and  
637 Reshetova *et al.* (2017) are based on the two-step simulation paradigm and only generate  
638 clonal trees under selection, leaving sequences generation to other methods. The most  
639 relevant method to ours are bcr-phylo by Davidsen and Matsen (2018) and gcdynamics by  
640 Childs *et al.* (2015), which simulate clonal trees of antibody-coding sequences under AM.  
641 Both bcr-phylo and gcdynamics have similarities and differences to our method (Table 6).  
642 For example, they both support multiple targets but only one round of simulations.  
643 Although our model is capable of multiple targets, for simplicity, DIMSIM uses one target  
644 per round of infection. However, the advantage of DIMSIM is that, unlike the two other  
645 methods that only simulate activated cells, it also simulates memory cells; as a result, it  
646 can simulate multiple rounds of infection by an evolving antigen with changing targets  
647 while considering memory built from previous infections. Moreover, DIMSIM simulates in



Table 6. *A comparison of Most relevant tools for AM simulation.*

|                  | DIMSIM<br>this paper                                 | bcr-phylo<br>Davidsen and Matsen (2018)                                   | gcdynamics<br>Childs <i>et al.</i> (2015) |
|------------------|------------------------------------------------------|---------------------------------------------------------------------------|-------------------------------------------|
| Targets          | Single-target (per round)                            | Multi-target (1 round)                                                    | Multi-target (1 round)                    |
| Rounds           | Yes                                                  | No                                                                        | No                                        |
| Affinity         | BLOSUM distance                                      | Hamming distance                                                          | Random energy landscape                   |
| Mutation         | Updated Yaari <i>et al.</i> (2013)                   | Yaari <i>et al.</i> (2013)                                                | i.i.d                                     |
| Scalability      | Up to millions of cells                              | Thousands of cells                                                        | Thousands of cells                        |
| Cell type        | Activated & Memory                                   | Activated                                                                 | Activated                                 |
| Germinal Centers | Combined (single)                                    | Combined (single)                                                         | Multiple (in competition)                 |
| Time             | Continuous                                           | Discrete generations                                                      | Discrete generations                      |
| Isotype          | No                                                   | Yes                                                                       | No                                        |
| Birth/Death rate | Polynomial fraction of individual and total affinity | Neutral: independent of total affinity<br>Kinetic: function of affinities | A function of affinity                    |

648 continuous time whereas the other tools simulate under discrete generations. All three  
649 methods use sequences to define affinity, albeit differently: DIMSIM using BLOSUM  
650 distance, bcr-phylo using hamming distance, and gcdynamics using random energy  
651 landscape. A main feature of DIMSIM is that its birth/death rates are polynomial  
652 fractions of individual and total affinity; this choice enables it to speed up the simulation,  
653 allowing it to scale up to millions of cells, unlike the other two methods. Advantages of the  
654 other tools include the fact that only bcr-phylo simulates isotype switching and only  
655 gcdynamics distinguishes intra- versus inter- germinal center competitions.

#### 656 *Limitations of the study*

657 Our study has limitations that should be kept in mind.

658 In our simulations, we did not add errors to sequence data used as input to clonal  
659 tree reconstruction methods. Real Rep-Seq samples undergo extensive PCR and thus might  
660 contain both sequencing and amplification errors. We assumed that error elimination is  
661 already performed (to perfection) prior to reconstruction using existing methods (e.g.,  
662 Vander Heiden *et al.*, 2014; Safonova *et al.*, 2015; Bolotin *et al.*, 2015; Shlemov *et al.*,  
663 2017). We also simulated only substitution SHMs but no insertions and deletions. We note  
664 that, in these shortcoming, our study is not different from most phylogenetics simulations  
665 that also fail to incorporate indels and many forms of errors in input, such as alignment

666 error, orthology error, and assembly error. Nevertheless, the impact of the error on various  
667 methods and the overall accuracy should be tested in future work. Similarly, the efficacy of  
668 methods that simultaneously filter errors and build clonal trees (e.g., Safonova and  
669 Pevzner, 2019; Lee *et al.*, 2017) should be subject of future research.

670 In our AM model, we had to adopt several arbitrary assumptions in order to  
671 simulate the selective pressure. For example, absent of a good model of receptor binding,  
672 we assumed the affinity grows gradually as the AA sequence becomes more similar to the  
673 target sequence (i.e., the best possible antibody for an antigen). The idea that AM occurs  
674 by mutational diffusion along one or more preferred paths in the genotype space has been  
675 supported by Kepler *et al.* (2014). Nevertheless, our i.i.d model is certainly a simplification  
676 without a clear empirical support. Moreover, we assumed the existence a target antibody  
677 sequence. The literature has increasingly documented highly convergent immune responses  
678 to the same epitope across individuals and conditions (Henry Dunand and Wilson, 2015;  
679 Robbiani *et al.*, 2020). This observation gives us reason to think the existence of target  
680 sequences is not a bad assumption; nevertheless, the choice of a *single* target may not be  
681 realistic. To model the change in the target as the viruses evolve across seasons, we chose  
682 targets with evolutionary divergence levels that mimic divergence levels of the antigen,  
683 albeit with some scaling factor. While we believe this choice is sensible, again, we have no  
684 evidence to back up this model on empirical grounds. It is conceivable that two antigens  
685 with high evolutionary distance are neutralized by similar antibodies, or that, antigens  
686 that are very similar require very distant antibodies. Finally, our 5-mer mutation model,  
687 while based on the empirical model of Yaari *et al.* (2013), still fails to capture some of the  
688 complexities of the real antibody evolution. For example, we concentrated substitutions on  
689 the CDR region, but other regions are known to also accumulate mutations (Safonova and  
690 Pevzner, 2019; Kirik *et al.*, 2017; Ovchinnikov *et al.*, 2018). Other B cell specific models  
691 (e.g., Elhanati *et al.*, 2015) including those that seek to tease out the effects of selection  
692 from background mutations (e.g., McCoy *et al.*, 2015) and per-position mutability models

693 (Kepler *et al.*, 2014) can be incorporated in the future.

694 For all these shortcomings in modelling, we offer several responses. The framework  
695 is designed to be flexible and can easily incorporate more complex models if a better  
696 understanding of processes behind antibody-antigen affinity is achieved (e.g., Luo and  
697 Perelson, 2015) and is formalized in mathematical models. Thus, our work should be  
698 considered a first step that will enable better modeling in future. We also remind the  
699 reader that our objective was to simulate so that we can benchmark various tools for  
700 reconstructing clonal trees. Thus, as long as our modelling choices did not distort the  
701 comparison of methods, some model misspecification can be tolerated. We observed that  
702 the choice of the best method was not sensitive to many parameter choices.

703 Beyond model simplifications, we also chose to simulate parts of the complex  
704 immune system response, but not others. For example, we simulated one clonal lineage  
705 involved in an immune response. As such, we ignored the important VDJ recombination  
706 step and sought to simply simulate a VDJ recombinant that is effective in fighting a  
707 specific antigen. Even then, we simulated only one clonal lineage at a time, a limitation  
708 that can be easily lifted in the future by starting from multiple root sequences with  
709 different VDJ settings and assigning to each a different target sequence. Note that our tool  
710 can be easily combined with methods of simulating VDJ recombination such as  
711 IGoR (Marcou *et al.*, 2018). Neither did we simulate light chains, which are often not  
712 captured in Rep-Seq sequencing data, but we note that extending the methodology to light  
713 chains, given better understanding of their evolution, will be possible.

714 Finally, while we tested several reconstruction methods, we were not able to test  
715 others. We are unable to install SAMM (Davidsen and Matsen, 2018) and GCtree (DeWitt  
716 *et al.*, 2018) due to their dependencies, and we were unable to find an implementation of  
717 the IgTree (Barak *et al.*, 2008) method.

*Applications of the framework*

718

719

720

721

722

723

724

725

726

727

728

729

730

731

732

733

734

735

The framework we designed for simulation of clonal trees can be extended for simulating other forms of micro-evolutionary scenarios. While the current implementation is geared towards AM simulations, our proposed algorithm enables forward-time simulation of very large numbers of entities under models that allow dependence between sequences and rates of birth, death, or transformation. The ability to simulate a very large number of entities combined with rates that change with properties of entities give use the necessary ingredients to simulate under complex models of evolution that consider selective pressure. Thus, our framework can be adopted for other forms of micro-evolutionary simulation such as the evolution of a virus within a host and accumulation of SHMs in tumor evolution. Such a possibility would become most intriguing if it can also model co-evolution of different types of entities (e.g., antibodies and viruses). While we did not simulate co-evolution here, we believe the framework is capable of performing such simulations by simply creating entity types (just like we had cell types) and making the BDT rates a function of properties across different cell types. Another promising direction for extensions of this work is to integrate the sequence evolutionary models with network-based disease transmissions models (e.g., Ratmann *et al.*, 2017; Moshiri *et al.*, 2019) to enable more accurate simulations of disease spread and evolution.

736

AVAILABILITY

737

738

739

DIMSIM simulation framework and relate code is publicly available at <https://github.com/chaoszhang/immunosimulator>. All the data are available at <https://github.com/chaoszhang/DIMSIM-data>.

740

REFERENCES

741

742

Amitai, A., Mesin, L., Victora, G. D., Kardar, M., and Chakraborty, A. K. 2017. A population dynamics model for clonal diversity in a germinal center. *Frontiers in*

- 743 *Microbiology*, 8(SEP): 1693.
- 744 Anisimova, M., Gascuel, O., and Sullivan, J. 2006. Approximate Likelihood-Ratio Test for  
745 Branches: A Fast, Accurate, and Powerful Alternative. *Systematic Biology*, 55(4):  
746 539–552.
- 747 Bao, Y., Bolotov, P., Dernovoy, D., Kiryutin, B., Zaslavsky, L., Tatusova, T., Ostell, J.,  
748 and Lipman, D. 2008. The Influenza Virus Resource at the National Center for  
749 Biotechnology Information. *Journal of Virology*, 82(2): 596–601.
- 750 Barak, M., Zuckerman, N. S., Edelman, H., Unger, R., and Mehr, R. 2008. IgTree©:  
751 Creating Immunoglobulin variable region gene lineage trees. *Journal of Immunological*  
752 *Methods*, 338(1-2): 67–74.
- 753 Bolotin, D. A., Poslavsky, S., Mitrophanov, I., Shugay, M., Mamedov, I. Z., Putintseva,  
754 E. V., and Chudakov, D. M. 2015. MiXCR: software for comprehensive adaptive  
755 immunity profiling. *Nature Methods*, 12(5): 380–381.
- 756 Bransteitter, R., Pham, P., Calabrese, P., and Goodman, M. F. 2004. Biochemical analysis  
757 of hypermutational targeting by wild type and mutant activation-induced cytidine  
758 deaminase. *J. Biol. Chem.*, 279(49): 51612–51621.
- 759 Childs, L. M., Baskerville, E. B., and Cobey, S. 2015. Trade-offs in antibody repertoires to  
760 complex antigens. *Philosophical Transactions of the Royal Society B: Biological*  
761 *Sciences*, 370(1676).
- 762 Davidsen, K. and Matsen, F. A. 2018. Benchmarking Tree and Ancestral Sequence  
763 Inference for B Cell Receptor Sequences. *Frontiers in immunology*, 9: 2451.
- 764 DeWitt, W. S. r., Mesin, L., Victora, G. D., Minin, V. N., and Matsen, F. A. t. 2018.  
765 Using Genotype Abundance to Improve Phylogenetic Inference. *Molecular biology and*  
766 *evolution*, 35(5): 1253–1265.

- 767 Elhanati, Y., Sethna, Z., Marcou, Q., Callan, C. G., Mora, T., and Walczak, A. M. 2015.  
768 Inferring processes underlying B-cell repertoire diversity. *Philosophical transactions of*  
769 *the Royal Society of London. Series B, Biological sciences*, 370(1676): 015115.
- 770 Eliyahu, S., Sharabi, O., Elmedvi, S., Timor, R., Davidovich, A., Vigneault, F., Clouser, C.,  
771 Hope, R., Nimer, A., Braun, M., Weiss, Y. Y., Polak, P., Yaari, G., and Gal-Tanamy, M.  
772 2018. Antibody Repertoire Analysis of Hepatitis C Virus Infections Identifies Immune  
773 Signatures Associated With Spontaneous Clearance. *Frontiers in Immunology*, 9.
- 774 Ellebedy, A. H., Jackson, K. J. L., Kissick, H. T., Nakaya, H. I., Davis, C. W., Roskin,  
775 K. M., McElroy, A. K., Oshansky, C. M., Elbein, R., Thomas, S., Lyon, G. M.,  
776 Spiropoulou, C. F., Mehta, A. K., Thomas, P. G., Boyd, S. D., and Ahmed, R. 2016.  
777 Defining antigen-specific plasmablast and memory B cell subsets in human blood after  
778 viral infection or vaccination. *Nature Immunology*, 17(10): 1226–1234.
- 779 Elliott, S. E., Kongpachith, S., Lingampalli, N., Adamska, J. Z., Cannon, B. J., Mao, R.,  
780 Blum, L. K., and Robinson, W. H. 2018. Affinity Maturation Drives Epitope Spreading  
781 and Generation of Proinflammatory AntiCitrullinated Protein Antibodies in  
782 Rheumatoid Arthritis. *Arthritis & Rheumatology*, 70(12): 1946–1958.
- 783 Galson, J. D., Trück, J., Clutterbuck, E. A., Fowler, A., Cerundolo, V., Pollard, A. J.,  
784 Lunter, G., and Kelly, D. F. 2016. B-cell repertoire dynamics after sequential hepatitis B  
785 vaccination and evidence for cross-reactive B-cell activation. *Genome Medicine*, 8(1): 68.
- 786 Georgiou, G., Ippolito, G. C., Beausang, J., Busse, C. E., Wardemann, H., and Quake,  
787 S. R. 2014. The promise and challenge of high-throughput sequencing of the antibody  
788 repertoire. *Nature Biotechnology*, 32(2): 158–168.
- 789 Goldman, N., Anderson, J. P., and Rodrigo, a. G. 2000. Likelihood-based tests of  
790 topologies in phylogenetics. *Systematic biology*, 49(4): 652–70.
- 791 Haynes, B. F., Kelsoe, G., Harrison, S. C., and Kepler, T. B. 2012. B-cell lineage

- 792 immunogen design in vaccine development with HIV-1 as a case study. *Nature*  
793 *Biotechnology*, 30(5): 423–433.
- 794 Henry Dunand, C. J. and Wilson, P. C. 2015. Restricted, canonical, stereotyped and  
795 convergent immunoglobulin responses. *Philosophical transactions of the Royal Society of*  
796 *London. Series B, Biological sciences*, 370(1676): 20140238–.
- 797 Hoehn, K. B., Lunter, G., and Pybus, O. G. 2017. A phylogenetic codon substitution  
798 model for antibody lineages. *Genetics*, 206(1): 417–427.
- 799 Horns, F., Vollmers, C., Croote, D., Mackey, S. F., Swan, G. E., Dekker, C. L., Davis,  
800 M. M., and Quake, S. R. 2016. Lineage tracing of human B cells reveals the in vivo  
801 landscape of human antibody class switching. *eLife*, 5.
- 802 Horns, F., Vollmers, C., Dekker, C. L., and Quake, S. R. 2019. Signatures of selection in  
803 the human antibody repertoire: Selective sweeps, competing subclones, and neutral drift.  
804 *Proceedings of the National Academy of Sciences*, 116(4): 1261–1266.
- 805 Hsiao, Y.-C., Shang, Y., DiCara, D. M., Yee, A., Lai, J., Kim, S. H., Ellerman, D., Corpuz,  
806 R., Chen, Y., Rajan, S., Cai, H., Wu, Y., Seshasayee, D., and Hötzel, I. 2019. Immune  
807 repertoire mining for rapid affinity optimization of mouse monoclonal antibodies. *mAbs*,  
808 11(4): 735–746.
- 809 Jackman, T. R., Larson, A., de Queiroz, K., Losos, J. B., and Cannatella, D. 1999.  
810 Phylogenetic Relationships and Tempo of Early Diversification in Anolis Lizards.  
811 *Systematic Biology*, 48(2): 254–285.
- 812 Jiang, N., He, J., Weinstein, J. a., Penland, L., Sasaki, S., He, X.-S., Dekker, C. L., Zheng,  
813 N.-Y., Huang, M., Sullivan, M., Wilson, P. C., Greenberg, H. B., Davis, M. M., Fisher,  
814 D. S., and Quake, S. R. 2013. Lineage structure of the human antibody repertoire in  
815 response to influenza vaccination. *Science translational medicine*, 5(171): 171ra19.

- 816 Kepler, T. B., Munshaw, S., Wiehe, K., Zhang, R., Yu, J. S., Woods, C. W., Denny, T. N.,  
817 Tomaras, G. D., Alam, S. M., Moody, M. A., Kelsoe, G., Liao, H.-X., and Haynes, B. F.  
818 2014. Reconstructing a B-cell clonal lineage. II. Mutation, selection, and affinity  
819 maturation. *Frontiers in Immunology*, 5(APR): 1–10.
- 820 Kirik, U., Persson, H., Levander, F., Greiff, L., and Ohlin, M. 2017. Antibody Heavy  
821 Chain Variable Domains of Different Germline Gene Origins Diversify through Different  
822 Paths. *Frontiers in Immunology*, 8(e33038): 1433.
- 823 Kurosawa, Y. and Tonegawa, S. 1982. Organization, structure, and assembly of  
824 immunoglobulin heavy chain diversity DNA segments. *The Journal of Experimental*  
825 *Medicine*, 155(1): 201–218.
- 826 Laserson, U., Vigneault, F., Gadala-Maria, D., Yaari, G., Uduman, M., Vander Heiden,  
827 J. A., Kelton, W., Taek Jung, S., Liu, Y., Laserson, J., Chari, R., Lee, J.-H., Bachelet,  
828 I., Hickey, B., Lieberman-Aiden, E., Hanczaruk, B., Simen, B. B., Egholm, M., Koller,  
829 D., Georgiou, G., Kleinstein, S. H., and Church, G. M. 2014. High-resolution antibody  
830 dynamics of vaccine-induced immune responses. *Proceedings of the National Academy of*  
831 *Sciences*, 111(13): 4928–4933.
- 832 Lee, D. W., Khavrutskii, I. V., Wallqvist, A., Bavari, S., Cooper, C. L., and Chaudhury, S.  
833 2017. BRILIA: Integrated tool for high-throughput annotation and lineage tree assembly  
834 of B-cell repertoires. *Frontiers in Immunology*, 7(JAN): 681.
- 835 Lees, W. D. and Shepherd, A. J. 2015. Utilities for High-Throughput Analysis of B-Cell  
836 Clonal Lineages. *Journal of immunology research*, 2015: 323506.
- 837 Lewis, P. O., Holder, M. T., and Holsinger, K. E. 2005. Polytomies and bayesian  
838 phylogenetic inference. *Systematic Biology*, 54(2): 241–253.
- 839 Lossius, A., Johansen, J. N., Vartdal, F., and Holmøy, T. 2016. High-throughput



- 840 sequencing of immune repertoires in multiple sclerosis. *Annals of Clinical and*  
841 *Translational Neurology*, 3(4): 295–306.
- 842 Luo, S. and Perelson, A. S. 2015. The challenges of modelling antibody repertoire  
843 dynamics in HIV infection. *Philosophical transactions of the Royal Society of London.*  
844 *Series B, Biological sciences*, 370(1676): 20140247–.
- 845 Magri, G., Comerma, L., Pybus, M., Sintes, J., Lligé, D., Segura-Garzón, D., Bascones, S.,  
846 Yeste, A., Grasset, E. K., Gutzeit, C., Uzzan, M., Ramanujam, M., van Zelm, M. C.,  
847 Albero-González, R., Vazquez, I., Iglesias, M., Serrano, S., Márquez, L., Mercade, E.,  
848 Mehandru, S., and Cerutti, A. 2017. Human Secretory IgM Emerges from Plasma Cells  
849 Clonally Related to Gut Memory B Cells and Targets Highly Diverse Commensals.  
850 *Immunity*, 47(1): 118–134.
- 851 Marcou, Q., Mora, T., and Walczak, A. M. 2018. High-throughput immune repertoire  
852 analysis with IGoR. *Nature Communications*, 9(1): 561.
- 853 McCoy, C. O., Bedford, T., Minin, V. N., Bradley, P., Robins, H., and Matsen, F. A. 2015.  
854 Quantifying evolutionary constraints on B-cell affinity maturation. *Philosophical*  
855 *transactions of the Royal Society of London. Series B, Biological sciences*, 370(1676):  
856 20140244.
- 857 Miho, E., Yermanos, A., Weber, C. R., Berger, C. T., Reddy, S. T., and Greiff, V. 2018.  
858 Computational Strategies for Dissecting the High-Dimensional Complexity of Adaptive  
859 Immune Repertoires. *Frontiers in Immunology*, 9.
- 860 Moshiri, N., Ragonnet-Cronin, M., Wertheim, J. O., and Mirarab, S. 2019. FAVITES:  
861 simultaneous simulation of transmission networks, phylogenetic trees and sequences.  
862 *Bioinformatics*, 35(11): 1852–1861.
- 863 Muramatsu, M., Kinoshita, K., Fagarasan, S., Yamada, S., Shinkai, Y., and Honjo, T.

- 864 2000. Class Switch Recombination and Hypermutation Require Activation-Induced  
865 Cytidine Deaminase (AID), a Potential RNA Editing Enzyme. *Cell*, 102(5): 553–563.
- 866 Nee, S. 2006. Birth-Death Models in Macroevolution. *Annual Review of Ecology,*  
867 *Evolution, and Systematics*, 37(1): 1–17.
- 868 Neuberger, M. S. and Milstein, C. 1995. Somatic hypermutation. *Current Opinion in*  
869 *Immunology*, 7(2): 248–254.
- 870 Ovchinnikov, V., Louveau, J. E., Barton, J. P., Karplus, M., and Chakraborty, A. K. 2018.  
871 Role of framework mutations and antibody flexibility in the evolution of broadly  
872 neutralizing antibodies. *eLife*, 7.
- 873 Peled, J. U., Kuang, F. L., Iglesias-Ussel, M. D., Roa, S., Kalis, S. L., Goodman, M. F.,  
874 and Scharff, M. D. 2008. The biochemistry of somatic hypermutation. *Annu. Rev.*  
875 *Immunol.*, 26: 481–511.
- 876 Pham, P., Bransteitter, R., Petruska, J., and Goodman, M. F. 2003. Processive  
877 AID-catalysed cytosine deamination on single-stranded DNA simulates somatic  
878 hypermutation. *Nature*, 424(6944): 103–107.
- 879 Ratmann, O., Hodcroft, E. B., Pickles, M., Cori, A., Hall, M., Lycett, S., Colijn, C.,  
880 Dearlove, B., Didelot, X., Frost, S., Hossain, A. M. M., Joy, J. B., Kendall, M., Kühnert,  
881 D., Leventhal, G. E., Liang, R., Plazzotta, G., Poon, A. F., Rasmussen, D. A., Stadler,  
882 T., Volz, E., Weis, C., Leigh Brown, A. J., and Fraser, C. 2017. Phylogenetic Tools for  
883 Generalized HIV-1 Epidemics: Findings from the PANGEA-HIV Methods Comparison.  
884 *Molecular Biology and Evolution*, 34(1): 185–203.
- 885 Reshetova, P., van Schaik, B. D., Klarenbeek, P. L., Doorenspleet, M. E., Esveldt, R. E.,  
886 Tak, P. P., Guikema, J. E., de Vries, N., and van Kampen, A. H. 2017. Computational  
887 model reveals limited correlation between germinal center B-cell subclone abundance and  
888 affinity: Implications for repertoire sequencing. *Frontiers in Immunology*, 8(MAR): 221.

- 889 Robbiani, D. F., Gaebler, C., Muecksch, F., Lorenzi, J. C. C., Wang, Z., Cho, A., Agudelo,  
890 M., Barnes, C. O., Gazumyan, A., Finkin, S., Hägglöf, T., Oliveira, T. Y., Viant, C.,  
891 Hurley, A., Hoffmann, H.-H., Millard, K. G., Kost, R. G., Cipolla, M., Gordon, K.,  
892 Bianchini, F., Chen, S. T., Ramos, V., Patel, R., Dizon, J., Shimeliovich, I., Mendoza,  
893 P., Hartweger, H., Nogueira, L., Pack, M., Horowitz, J., Schmidt, F., Weisblum, Y.,  
894 Michailidis, E., Ashbrook, A. W., Waltari, E., Pak, J. E., Huey-Tubman, K. E.,  
895 Koranda, N., Hoffman, P. R., West, A. P., Rice, C. M., Hatzioannou, T., Bjorkman,  
896 P. J., Bieniasz, P. D., Caskey, M., and Nussenzweig, M. C. 2020. Convergent antibody  
897 responses to SARS-CoV-2 in convalescent individuals. *Nature*.
- 898 Robinson, D. and Foulds, L. 1981. Comparison of phylogenetic trees. *Mathematical*  
899 *Biosciences*, 53(1-2): 131–147.
- 900 Robinson, W. H. 2015. Sequencing the functional antibody repertoire: diagnostic and  
901 therapeutic discovery. *Nature Reviews Rheumatology*, 11(3): 171–182.
- 902 Rogozin, I. and Kolchanov, N. 1992. Somatic hypermutagenesis in immunoglobulin genes.  
903 ii. influence of neighbouring base sequences on mutagenesis. *Biochim Biophys Acta*,  
904 1171(1): 11–18.
- 905 Rogozin, I. B. and Diaz, M. 2004. Cutting edge: DGYW/WRCH is a better predictor of  
906 mutability at G:C bases in Ig hypermutation than the widely accepted RGYW/WRCY  
907 motif and probably reflects a two-step activation-induced cytidine deaminase-triggered  
908 process. *J. Immunol.*, 172(6): 3382–3384.
- 909 Safonova, Y. and Pevzner, P. A. 2019. IgEvolution: clonal analysis of antibody repertoires.  
910 *bioRxiv*, page 725424.
- 911 Safonova, Y., Bonissone, S., Kurpilyansky, E., Starostina, E., Lapidus, A., Stinson, J.,  
912 DePalatis, L., Sandoval, W., Lill, J., and Pevzner, P. A. 2015. IgRepertoireConstructor:  
913 a novel algorithm for antibody repertoire construction and immunoproteogenomics  
914 analysis. *Bioinformatics*, 31(12): i53–i61.

- 915 Shapiro, G. S., Ellison, M. C., and Wysocki, L. J. 2003. Sequence-specific targeting of two  
916 bases on both DNA strands by the somatic hypermutation mechanism. *Mol. Immunol.*,  
917 40(5): 287–295.
- 918 Shlemov, A., Bankevich, S., Bzikadze, A., Turchaninova, M. A., Safonova, Y., and Pevzner,  
919 P. A. 2017. Reconstructing Antibody Repertoires from Error-Prone Immunosequencing  
920 Reads. *The Journal of Immunology*, 199(9): 3369–3380.
- 921 Smith, D. S., Creadon, G., Jena, P. K., Portanova, J. P., Kotzin, B. L., and Wysocki, L. J.  
922 1996. Di- and trinucleotide target preferences of somatic mutagenesis in normal and  
923 autoreactive B cells. *J. Immunol.*, 156(7): 2642–2652.
- 924 Sok, D., Laserson, U., Laserson, J., Liu, Y., Vigneault, F., Julien, J.-P., Briney, B., Ramos,  
925 A., Saye, K. F., Le, K., Mahan, A., Wang, S., Kardar, M., Yaari, G., Walker, L. M.,  
926 Simen, B. B., St. John, E. P., Chan-Hui, P.-Y., Swiderek, K., Kleinstein, S. H., Alter,  
927 G., Seaman, M. S., Chakraborty, A. K., Koller, D., Wilson, I. A., Church, G. M.,  
928 Burton, D. R., and Poignard, P. 2013a. The Effects of Somatic Hypermutation on  
929 Neutralization and Binding in the PGT121 Family of Broadly Neutralizing HIV  
930 Antibodies. *PLoS Pathogens*, 9(11): e1003754.
- 931 Sok, D., Laserson, U., Laserson, J., Liu, Y., Vigneault, F., Julien, J.-P., Briney, B., Ramos,  
932 A., Saye, K. F., Le, K., Mahan, A., Wang, S., Kardar, M., Yaari, G., Walker, L. M.,  
933 Simen, B. B., St John, E. P., Chan-Hui, P.-Y., Swiderek, K., Kleinstein, S. H., Alter, G.,  
934 Seaman, M. S., Chakraborty, A. K., Koller, D., Wilson, I. A., Church, G. M., Burton,  
935 D. R., and Poignard, P. 2013b. The effects of somatic hypermutation on neutralization  
936 and binding in the PGT121 family of broadly neutralizing HIV antibodies. *PLoS*  
937 *pathogens*, 9(11): e1003754–e1003754.
- 938 Stadler, T., Vaughan, T. G., Gavryushkin, A., Guindon, S., Kühnert, D., Leventhal, G. E.,  
939 and Drummond, A. J. 2015. How well can the exponential-growth coalescent

- 940 approximate constant-rate birthdeath population dynamics? *Proceedings of the Royal*  
941 *Society B: Biological Sciences*, 282(1806): 20150420.
- 942 Stamatakis, A. 2014. RAxML version 8: A tool for phylogenetic analysis and post-analysis  
943 of large phylogenies. *Bioinformatics*, 30(9): 1312–1313.
- 944 Stern, J. N. H., Yaari, G., Vander Heiden, J. A., Church, G., Donahue, W. F., Hintzen,  
945 R. Q., Huttner, A. J., Laman, J. D., Nagra, R. M., Nylander, A., Pitt, D., Ramanan, S.,  
946 Siddiqui, B. A., Vigneault, F., Kleinstein, S. H., Hafler, D. A., and O'Connor, K. C.  
947 2014. B cells populating the multiple sclerosis brain mature in the draining cervical  
948 lymph nodes. *Science Translational Medicine*, 6(248): 107–248.
- 949 Tonegawa, S. 1983. Somatic generation of antibody diversity. *Nature*, 302(5909): 575–581.
- 950 Vander Heiden, J. A., Yaari, G., Uduman, M., Stern, J. N., OConnor, K. C., Hafler, D. A.,  
951 Vigneault, F., and Kleinstein, S. H. 2014. pRESTO: a toolkit for processing  
952 high-throughput sequencing raw reads of lymphocyte receptor repertoires.  
953 *Bioinformatics*, 30(13): 1930–1932.
- 954 Walsh, H. E., Kidd, M. G., Moum, T., and Friesen, V. L. 1999. Polytomies and the power  
955 of phylogenetic inference. *Evolution*, 53(3): 932–937.
- 956 Watson, C. T., Glanville, J., and Marasco, W. A. 2017. The Individual and Population  
957 Genetics of Antibody Immunity. *Trends in Immunology*, 38(7): 459–470.
- 958 Weber, C. R., Akbar, R., Yermanos, A., Pavlović, M., Snapkov, I., Sandve, G. K., Reddy,  
959 S. T., and Greiff, V. 2020. immuneSIM: tunable multi-feature simulation of B- and  
960 T-cell receptor repertoires for immunoinformatics benchmarking. *Bioinformatics*,  
961 36(11): 3594–3596.
- 962 Yaari, G., Vander Heiden, J. A., Uduman, M., Gadala-Maria, D., Gupta, N., Joel, J. N.,  
963 O'Connor, K. C., Hafler, D. A., Laserson, U., Vigneault, F., and Kleinstein, S. H. 2013.  
964 Models of somatic hypermutation targeting and substitution based on synonymous

- 965 mutations from high-throughput immunoglobulin sequencing data. *Frontiers in*  
966 *Immunology*, 4(NOV).
- 967 Yaari, G., Benichou, J. I. C., Vander Heiden, J. A., Kleinstein, S. H., and Louzoun, Y.  
968 2015. The mutation patterns in B-cell immunoglobulin receptors reflect the influence of  
969 selection acting at multiple time-scales. *Philosophical transactions of the Royal Society*  
970 *of London. Series B, Biological sciences*, 370(1676): 20140242–.
- 971 Yermanos, A. D., Dounas, A. K., Stadler, T., Oxenius, A., and Reddy, S. T. 2018. Tracing  
972 Antibody Repertoire Evolution by Systems Phylogeny. *Frontiers in Immunology*, 9.
- 973 Zhang, C., Dinh, V., and Matsen, F. A. 2020. Non-bifurcating phylogenetic tree inference  
974 via the adaptive LASSO. *Journal of the American Statistical Association*, pages 1–41.

975 ACKNOWLEDGEMENTS

976 We would like to thank Pavel A. Pevzner, Li-Fan Lu, and Jiawang Nie for insightful  
977 discussions on clonal tree reconstruction, affinity maturation, and optimization methods.  
978 This work was supported by National Science Foundation (NSF) grant III-1845967.  
979 Computations were performed on the San Diego Supercomputer Center (SDSC) through  
980 XSEDE allocations, which is supported by the NSF grant ACI-1053575.

APPENDIX

Supplementary Materials

SUPPLEMENTARY METHODS

*Derivation of Equation (1)*

$$\begin{aligned}
 \frac{\Lambda_B(\mathbf{x}_i, \mathbf{S})}{\lambda} &= \frac{\Lambda_B(\mathbf{x}_i, \mathbf{S})}{\sum_{j \in S} (\Lambda_B(\mathbf{x}_j, \mathbf{S}) + \Lambda_D(\mathbf{x}_j, \mathbf{S}) + \Lambda_T(\mathbf{x}_j, \mathbf{S}))} \\
 &= \frac{\sum_{\alpha, \beta \in \Gamma} \mathcal{B}_{\alpha, \beta} \mathbf{S}^\beta \mathbf{x}_i^\alpha}{\sum_{\alpha, \beta \in \Gamma} P_{\alpha, \beta} \mathbf{S}^\beta \theta_\alpha} = \sum_{\alpha, \beta \in \Gamma} \left( \mathcal{B}_{\alpha, \beta} \mathbf{S}^\beta \mathbf{x}_i^\alpha \frac{1}{\sum_{\bar{\alpha}, \bar{\beta} \in \Gamma} P_{\bar{\alpha}, \bar{\beta}} \mathbf{S}^{\bar{\beta}} \theta_{\bar{\alpha}}} \right) \\
 &= \sum_{\alpha, \beta \in \Gamma} \left( \left( \frac{\mathcal{B}_{\alpha, \beta} \mathbf{S}^\beta \mathbf{x}_i^\alpha}{P_{\alpha, \beta} \mathbf{S}^\beta \theta_\alpha} \right) \left( \frac{P_{\alpha, \beta} \mathbf{S}^\beta \theta_\alpha}{\sum_{\bar{\alpha}, \bar{\beta} \in \Gamma} P_{\bar{\alpha}, \bar{\beta}} \mathbf{S}^{\bar{\beta}} \theta_{\bar{\alpha}}} \right) \right) \\
 &= \sum_{\alpha, \beta \in \Gamma} \left( \left( \frac{\mathcal{B}_{\alpha, \beta}}{P_{\alpha, \beta}} \right) \left( \frac{\mathbf{x}_i^\alpha}{\theta_\alpha} \right) \left( \frac{P_{\alpha, \beta} \mathbf{S}^\beta \theta_\alpha}{\sum_{\bar{\alpha}, \bar{\beta} \in \Gamma} P_{\bar{\alpha}, \bar{\beta}} \mathbf{S}^{\bar{\beta}} \theta_{\bar{\alpha}}} \right) \right).
 \end{aligned} \tag{S1}$$

*Somatic hypermutagenesis frequency models for  $\mathbf{K}^5$  and  $f$*

Our model is based on an empirical frequency  $\mathbf{K}^5(s, s_1, s_2, s_3, s_4, s_5)$  matrix that counts the number of times 5-mer  $(s_1, s_2, s_3, s_4, s_5)$  converts to  $(s_1, s_2, s, s_4, s_5)$  in one cycle of cell division during hyper-mutation. Given the matrix, we define

$$f(s, s_1, s_2, s_3, s_4, s_5) = \begin{cases} \mathbf{K}^5(s, s_1, s_2, s_3, s_4, s_5) \frac{\mu}{\text{RateEmp}} & s \neq s_3 \\ 1 - \sum_{s' \in \{A, C, G, T\} - \{s\}} \mathbf{K}^5(s', s_1, s_2, s_3, s_4, s_5) & s = s_3 \end{cases} \tag{S2}$$

where

$$\text{RateEmp} = 1 - \frac{\sum_{s_1, s_2, s_3, s_4, s_5 \in \{A, C, G, T\}} \mathbf{K}^5(s_3, s_1, s_2, s_3, s_4, s_5)}{\sum_{s, s_1, s_2, s_3, s_4, s_5 \in \{A, C, G, T\}} \mathbf{K}^5(s, s_1, s_2, s_3, s_4, s_5)}. \tag{S3}$$

Somatic hypermutagenesis of antibodies is the result of activation-induced deaminase (AID) enzyme activity that changes a random C:G base into a U:G base in B cell DNA. U:G mismatch can be repaired using UDG (uracil-DNA glycosylase) or MMR (DNA mismatch repair) machinery that forms diversity of hypermutations (Peled *et al.*, 2008). Certain biological mechanisms of SHM occurrences were studied extensively. For

995 example, Rogozin and Kolchanov (1992) observed specific hot/cold-spot DNA motifs for  
996 SHMs in immunoglobulin genes. Particularly, WRCY/RGYW where  $W = \{A, T\}$ ,  $Y =$   
997  $\{C, T\}$ ,  $R = \{G, A\}$  and later predicted more general WRCH/DGYW with  $H = \{A, C,$   
998  $T\}$  and  $D = \{A, G, T\}$  motifs are hot-spots for SHMs caused by weak hydrogen-bonds  
999 (Rogozin and Diaz, 2004). SYC/GRS ( $S = C, G$ ) is a cold-spot motif caused by strong  
1000 hydrogen-bonds (Bransteitter *et al.*, 2004). The locality of AID enzyme activity has been  
1001 emphasized. (Smith *et al.*, 1996; Shapiro *et al.*, 2003).

1002 To simulate SHM we modified a model proposed by Yaari *et al.* (2013). The model  
1003 extends the notion of hot/cold-spots and suggests that a certain hierarchy of mutabilities  
1004 exists following Smith *et al.* (1996) and Shapiro *et al.* (2003). The model is based on the  
1005 mutability of a central base in each 5-mer of an antibody heavy chain and consists of two  
1006 parts: a targeting model identifying if a mutation occurs in the variable part of an antibody  
1007 and a substitution model providing an insight into what is this mutation. In order to avoid  
1008 selection bias, the authors considered 5-mers where only synonymous substitutions of the  
1009 central base are possible and inferred probabilities for other 5-mers. Unfortunately,  
1010 synonymous substitutions constitute only a fraction of possible mutations. To overcome  
1011 this issue Yaari *et al.* (2013) proposed a special inference method to estimate parameters  
1012 for the rest of 5-mers. Parameters for targeting and substitution models were inferred for  
1013 468 and 740 5-mers, respectively. However, the accuracy of this procedure was shown to be  
1014 sub-optimal (Yaari *et al.*, 2013, Table 2). Additionally, some of the datasets that were used  
1015 to estimate the parameters are derived from an error-prone 454 sequencing technology.

1016 We re-estimated the parameters of this model and considered all 5-mers without  
1017 limiting our scope to synonymous mutations. We also utilized three up-to-date repertoire  
1018 sequencing datasets (all data was produced using the Illumina MiSeq platform):  
1019 *i*) PRJNA349143. Time series of three individuals during influenza vaccination, both  
1020 before and after vaccination. *ii*) PRJNA395083. Bulk unsorted PBMC from peripheral  
1021 blood of several healthy donors. *iii*) A dataset of paired end sequences, added to increase



1022 power. While the last dataset we used is not publicly available, we make the resulting  
1023 k-mer model available publicly at  
1024 <https://github.com/chaoszhang/immunosimulator/blob/master/kmerFreq.txt>.

1025 From each dataset we obtained a matrix of the size  $1024 \times 4$ , where each row  
1026 corresponds to a distinct 5-mer and contains *# nonmutated occurrences* of this 5-mer and  
1027 three possible *# nucleotide substitution occurrences*. To calculate this matrix for a given  
1028 dataset, we found the closest V gene for every read and record the number of observed  
1029 5-mers in the gene and their corresponding mutated copies across the read. For any 5-mer  
1030  $K$ , the corresponding row of a constructed matrix can be viewed simultaneously as a value  
1031 of *Binomial* and *Multinomial* distributions. *Binomial* distribution represents the number  
1032 of occurred mutations among all occurrences of the 5-mer  $K$ , while *Multinomial*  
1033 distribution indicates the number of mutations to specific bases among all occurred  
1034 mutations. The parameters of these distributions indicate the mutability and substitution  
1035 profiles for each 5-mer  $K$ . The 5-mer frequencies were combined across all these datasets to  
1036 obtain the final matrix, available at  
1037 <https://github.com/chaoszhang/immunosimulator/blob/master/kmerFreq.txt>.

#### 1038 *Default parameters*

1039 Here we provide the actual default values used for several parameters that did not  
1040 fit in Table 1.

1041 *BLOSUM*. The BLOSUM matrix table (Table S1) is obtained from  
 1042 <ftp://ftp.ncbi.nih.gov/blast/matrices/BLOSUM100>.

Table S1. BLOSUM table

|   | A  | R  | N  | D   | C  | Q  | E  | G  | H  | I  | L  | K  | M  | F  | P  | S  | T  | W   | Y  | V  |
|---|----|----|----|-----|----|----|----|----|----|----|----|----|----|----|----|----|----|-----|----|----|
| A | 8  | -3 | -4 | -5  | -2 | -2 | -3 | -1 | -4 | -4 | -4 | -2 | -3 | -5 | -2 | 1  | -1 | -6  | -5 | -2 |
| R | -3 | 10 | -2 | -5  | -8 | 0  | -2 | -6 | -1 | -7 | -6 | 3  | -4 | -6 | -5 | -3 | -3 | -7  | -5 | -6 |
| N | -4 | -2 | 11 | 1   | -5 | -1 | -2 | -2 | 0  | -7 | -7 | -1 | -5 | -7 | -5 | 0  | -1 | -8  | -5 | -7 |
| D | -5 | -5 | 1  | 10  | -8 | -2 | 2  | -4 | -3 | -8 | -8 | -3 | -8 | -8 | -5 | -2 | -4 | -10 | -7 | -8 |
| C | -2 | -8 | -5 | -8  | 14 | -7 | -9 | -7 | -8 | -3 | -5 | -8 | -4 | -4 | -8 | -3 | -3 | -7  | -6 | -3 |
| Q | -2 | 0  | -1 | -2  | -7 | 11 | 2  | -5 | 1  | -6 | -5 | 2  | -2 | -6 | -4 | -2 | -3 | -5  | -4 | -5 |
| E | -3 | -2 | -2 | 2   | -9 | 2  | 10 | -6 | -2 | -7 | -7 | 0  | -5 | -8 | -4 | -2 | -3 | -8  | -7 | -5 |
| G | -1 | -6 | -2 | -4  | -7 | -5 | -6 | 9  | -6 | -9 | -8 | -5 | -7 | -8 | -6 | -2 | -5 | -7  | -8 | -8 |
| H | -4 | -1 | 0  | -3  | -8 | 1  | -2 | -6 | 13 | -7 | -6 | -3 | -5 | -4 | -5 | -3 | -4 | -5  | 1  | -7 |
| I | -4 | -7 | -7 | -8  | -3 | -6 | -7 | -9 | -7 | 8  | 2  | -6 | 1  | -2 | -7 | -5 | -3 | -6  | -4 | 4  |
| L | -4 | -6 | -7 | -8  | -5 | -5 | -7 | -8 | -6 | 2  | 8  | -6 | 3  | 0  | -7 | -6 | -4 | -5  | -4 | 0  |
| K | -2 | 3  | -1 | -3  | -8 | 2  | 0  | -5 | -3 | -6 | -6 | 10 | -4 | -6 | -3 | -2 | -3 | -8  | -5 | -5 |
| M | -3 | -4 | -5 | -8  | -4 | -2 | -5 | -7 | -5 | 1  | 3  | -4 | 12 | -1 | -5 | -4 | -2 | -4  | -5 | 0  |
| F | -5 | -6 | -7 | -8  | -4 | -6 | -8 | -8 | -4 | -2 | 0  | -6 | -1 | 11 | -7 | -5 | -5 | 0   | 4  | -3 |
| P | -2 | -5 | -5 | -5  | -8 | -4 | -4 | -6 | -5 | -7 | -7 | -3 | -5 | -7 | 12 | -3 | -4 | -8  | -7 | -6 |
| S | 1  | -3 | 0  | -2  | -3 | -2 | -2 | -2 | -3 | -5 | -6 | -2 | -4 | -5 | -3 | 9  | 2  | -7  | -5 | -4 |
| T | -1 | -3 | -1 | -4  | -3 | -3 | -3 | -5 | -4 | -3 | -4 | -3 | -2 | -5 | -4 | 2  | 9  | -7  | -5 | -1 |
| W | -6 | -7 | -8 | -10 | -7 | -5 | -8 | -7 | -5 | -6 | -5 | -8 | -4 | 0  | -8 | -7 | -7 | 17  | 2  | -5 |
| Y | -5 | -5 | -5 | -7  | -6 | -4 | -7 | -8 | 1  | -4 | -4 | -5 | -5 | 4  | -7 | -5 | -5 | 2   | 12 | -5 |
| V | -2 | -6 | -7 | -8  | -3 | -5 | -5 | -8 | -7 | 4  | 0  | -5 | 0  | -3 | -6 | -4 | -1 | -5  | -5 | 8  |

1043  $\hat{\Psi}$  and  $\zeta_0$ . The starting sequence  $\hat{\Psi}$  is set to be CAGGTGCAGCTGCAGGAGTCGGGCCAGG  
 1044 ACTGGTGAAGCCTTCACAGACCCTGTCCCTCACCTGCACTGTCTCTGGTGGCTCCATCAGCAGTGGTGGTTACTA  
 1045 CTGGAGCTGGATCCGCCAGCACCCAGGGAAGGGCCTGGAGTGGATTGGGTACATCTATTACAGTGGGAGCACCTA  
 1046 CTACAACCCGTCCCTCAAGAGTCGAGTTACCATATCAGTAGACACGTCTAAGAACCAGTTCTCCCTGAAGCTGAG  
 1047 CTCTGTGACTGCCGCGGACACGGCCGTGTATTACTGTGCGAGAGCGCGGTCAATAGGGATATTGCGTACGGCAA  
 1048 CTGGTTCGACCCCTGGGGCCAGGGGACCCTGGTCACCGTCTCCTCA and thus  $\zeta_0$  is QVQLQESGPGLVKPSQT  
 1049 LSLTCTVSGGSISSGGYYWSWIRQHPGKGLEWIGYIYYSGSTYYNPSLKSRTISVDTSKNQFSLKLSSVTAADT  
 1050 AVYYCARARVNRDIAYGNWFDWPWGQGLTVSS.

1051  $\eta_i$ ,  $\zeta_i$ , and  $t_i$ . Are given in Table S2.

REFERENCES

51

Table S2. Flu accession number, CDRs of target sequences, and starting day of infection

| <i>i</i> | Accession Number | Target CDR1 | Target CDR2       | Target CDR3        | Day  |
|----------|------------------|-------------|-------------------|--------------------|------|
| 1        | AAK70482.1       | SGGY        | IGYIYSGSTYYNPSL   | ARARVNRDIAYGNWFDP  | 0    |
| 2        | AAK70478.1       | CWWVP       | WWCHCGWCNVXXNIXF  | ARARVNREXAYGNWFZA  | 182  |
| 3        | ABL76892.1       | WWWXX       | XGYVYYSGSDYYDPSL  | VKVKVNKEVVYGNWFEA  | 365  |
| 4        | AFP83103.2       | WWWAB       | TBYVYYSGSDYYDXSL  | VKVKINKEVVYGNWFEA  | 398  |
| 5        | AFP83094.2       | WWWGX       | TGYVYYSGSDYYDXSL  | VKVKVNKEVVYGNWFEEQ | 431  |
| 6        | AFP83095.2       | WWCPP       | WWCHCAWXBTXXBISL  | ARARVNRELAYGNWFEA  | 464  |
| 7        | AFP83197.2       | WWCPP       | WWCHCZWYZVXXBISF  | ARARVNRELAYGNXFEA  | 497  |
| 8        | AFP83098.2       | WWWAX       | AGYVYYSGTDYYDBSL  | VKVKINKEVVYGBWFEEZ | 530  |
| 9        | AFP83100.2       | WWWPK       | SXHVVYSGSDYYDXSL  | VKVKVNKEVVYGNWFEA  | 564  |
| 10       | AAO38870.2       | WWCPP       | WWCHCCWXBVXYBXS   | ARARVNRELAYGNWFZA  | 597  |
| 11       | AFP83199.2       | WWLPP       | WWCHCEWLHVXXXIXY  | ARARVNRELAYGNWFZA  | 630  |
| 12       | ABL76881.1       | WLWCG       | KXYVYYSGSQFYDASL  | VKVKLNKEVVYGNWFZL  | 663  |
| 13       | AFP83097.2       | WCWCG       | CRWVYYXXSDYYDIXL  | VKVKINKEVVYGDWFEEQ | 696  |
| 14       | AFP83202.2       | WXYXY       | TGYVYYSGSDYYDPSL  | VKVKMNKEVVYGNWFEA  | 730  |
| 15       | AFP83201.2       | WWVPP       | WWCNCCWFBTXXXLSF  | ARARVNRELAYGNWFEA  | 763  |
| 16       | AFP83118.2       | WYYXD       | TGYVYYSGSDYYBPSL  | VKVKLNKEVVYGNWFZK  | 796  |
| 17       | AFP83200.2       | WWCPP       | WWCHCCYIBVXXBXS   | ARARVNRELAYGNWFZA  | 829  |
| 18       | AFP83107.2       | WWCPP       | WWCHCCYVBTXXBXS   | ARARVNRELAYGNWYZA  | 862  |
| 19       | AFP83112.2       | WFDWG       | XKWVYYSGSDYYDXSL  | VKVKINKEVVYGNWFEEQ | 895  |
| 20       | AFP83115.2       | WWCPP       | WWCHCCQIBTXXBXS   | ARARVNRELAYGNWFZG  | 929  |
| 21       | AFP83114.2       | WPWGD       | XGYVHYRSDDYYDPSL  | VKVKXNKZVYRNWFEP   | 962  |
| 22       | AFP83110.2       | WWCPD       | WWCHCCWIDWXXBXXY  | ARARNRZLAYRNWFEEA  | 995  |
| 23       | AFP83105.2       | WYWGN       | GXLYVYSGSDYYDPSL  | IKVKIDKELVYGDWFZV  | 1028 |
| 24       | AFP83106.2       | WWCPP       | WWCHCCWVWWNEGLXB  | GXXRXXRDLAYGNWYXA  | 1061 |
| 25       | AFP83127.2       | WFWBG       | TGYLYVYSGSDYYDASL | IKVKXNKELVYGNWFET  | 1095 |
| 26       | AFP83124.2       | WCWCG       | BGYLYVYSGSDYYBFSL | IKVCIBKEMVYGBWFET  | 1216 |
| 27       | AFP83130.2       | WHHP        | WWCHCCWRBCXXXSF   | ARARVNRSLAYGNWFEEA | 1338 |
| 28       | AFP83134.2       | WBYXY       | TGYVYYSGSDYYBPSL  | VKVKMNKEVVYGNWFEEA | 1460 |
| 29       | AFP83131.2       | WHHP        | WWCHCCWRBLXXXSF   | ARARVNRZLAYGNWFEEA | 1581 |
| 30       | AFP83135.2       | PPYGD       | PGKVYYSRSDYYDDSL  | IKVKXNKYVYRNWFEEK  | 1703 |
| 31       | AFP83150.2       | HPYGD       | PGBVYYSRSDYYDBSL  | VKVKINKEVVYRNWFEEK | 1825 |
| 32       | AFP83206.2       | HPYGD       | PHCYYSRSDYYDBSL   | VKVKXNKVYRNWFEEZ   | 1946 |
| 33       | AFP83147.2       | HPYGD       | PGHVYYSRSDYYDPSL  | IKVKINBXVYRNWFEEK  | 2068 |
| 34       | AFP83154.2       | WXXAY       | PGYVYYSGSDYYDPSL  | VKVKMNKEVVYGNWFEP  | 2190 |
| 35       | AFP83155.2       | LPYGD       | PGHVYYSRSDYYDDSL  | VKVKLBKIVYRNWFEEK  | 2281 |
| 36       | AFP83160.2       | HPYGD       | PGHVYYSRSDYFDDSL  | VKVKXNKZVYRNWFEEK  | 2372 |
| 37       | AFP83159.2       | HPYGD       | PGHVYYSHSDYYDDSL  | IKVKXNKZVYRNWFEEK  | 2463 |
| 38       | AFP83166.2       | WEHGY       | XGYVYYSGSDYYDPSC  | VKVKMNKEVVYGNWFEP  | 2555 |
| 39       | AFP83173.2       | WBIMY       | LGFVYYSGSDYYBPSL  | VKVKMNKZVYGNWFZA   | 2920 |
| 40       | AFP83163.2       | WPIFY       | LGYVYYSGSBYYBPSL  | VKVKMNKZIVYGNWFZA  | 3011 |
| 41       | AFP83170.2       | YZIMY       | LGYVYYASDYYBPSL   | VKVKMNKEIVYGNWFEEA | 3102 |
| 42       | AFP83174.2       | YPIMY       | SGYVYYSGSDYYBPSL  | VKVKMNKEVVYGBWFEEA | 3193 |
| 43       | AFP83184.2       | ZSZYY       | TDYVYYSGIDYYTPSL  | VKVKMNKEVVYDYWFEP  | 3285 |
| 44       | AFP83185.2       | BBGY        | TDYVYYSGIDYYTPSL  | VKVKMTKEVVYDYWFZP  | 3345 |
| 45       | AFP83181.2       | EBAY        | TDYVYYSGVDYYEYPSL | VKVKMNKEVVYDYWFEP  | 3406 |
| 46       | AFP83208.2       | WDIPY       | LGYVYYASDYYBPSL   | VKVKMNKZVYGNWFZA   | 3467 |
| 47       | AFP83178.2       | FKIMY       | LGYVYYSGSDYYDPSL  | VKWKMBKZVYGNWFZA   | 3528 |
| 48       | AFP83177.2       | YEIMW       | LGFVYYSGSDYYBPSL  | VKVKMNKZAVYGNWFZA  | 3589 |
| 49       | AJK04689.1       | DDGY        | TDYVYYSGIDYYEYPSL | VKMKMAKZTVYDYWFZP  | 3650 |
| 50       | AJK04818.1       | EBFYY       | TDYVYYSGVDYYCPSI  | VKVKMBKEVVYDYWFEP  | 3832 |
| 51       | AJK04119.1       | ZDPYY       | TDYVYYSGIDYYBPSL  | VKVKMRKEVVYDHWFEF  | 4015 |
| 52       | AFP83190.2       | DDDYF       | TDYVYYSGIDYYWPSL  | VKVKMTKZVYDYWFZP   | 4075 |
| 53       | AJK05467.1       | DDRY        | TDYIYYSGIDYYKPSL  | VKVKMSKZVYDYWFZP   | 4136 |
| 54       | AJK05084.1       | DDGY        | TDYIFYSGITYYVXPX  | VKVKMSKEVIYDHWFEF  | 4197 |
| 55       | AJK04964.1       | DDGY        | CDYXFYSGIDYYSPSC  | VKVKMSKEVVYDYWFEP  | 4258 |
| 56       | AJK05278.1       | EDFYY       | TDYVWYTGIDYYXPX   | VKVKMVXVXDYWFZP    | 4319 |

SUPPLEMENTARY TABLES AND FIGURES

1052

Table S3. Birth, death, and transformation rate functions as polynomials.

| Rate functions                        | Infected stage                                                                                                                | Dormant stage                               |
|---------------------------------------|-------------------------------------------------------------------------------------------------------------------------------|---------------------------------------------|
| $\Lambda_B(\mathbf{x}_i, \mathbf{S})$ | $\lambda_b g_i$                                                                                                               | 0                                           |
| $\Lambda_D(\mathbf{x}_i, \mathbf{S})$ | $\frac{\lambda_b(1-\rho_p-\rho_m)}{C} \left(\frac{g_i}{a_i}\right) \sigma + (\rho_p \lambda_b - \lambda'_d) g_i + \lambda'_d$ | $(\lambda_d - \lambda'_d) g_i + \lambda'_d$ |
| $\Lambda_T(\mathbf{x}_i, \mathbf{S})$ | $t_i$                                                                                                                         | 0                                           |

REFERENCES

53

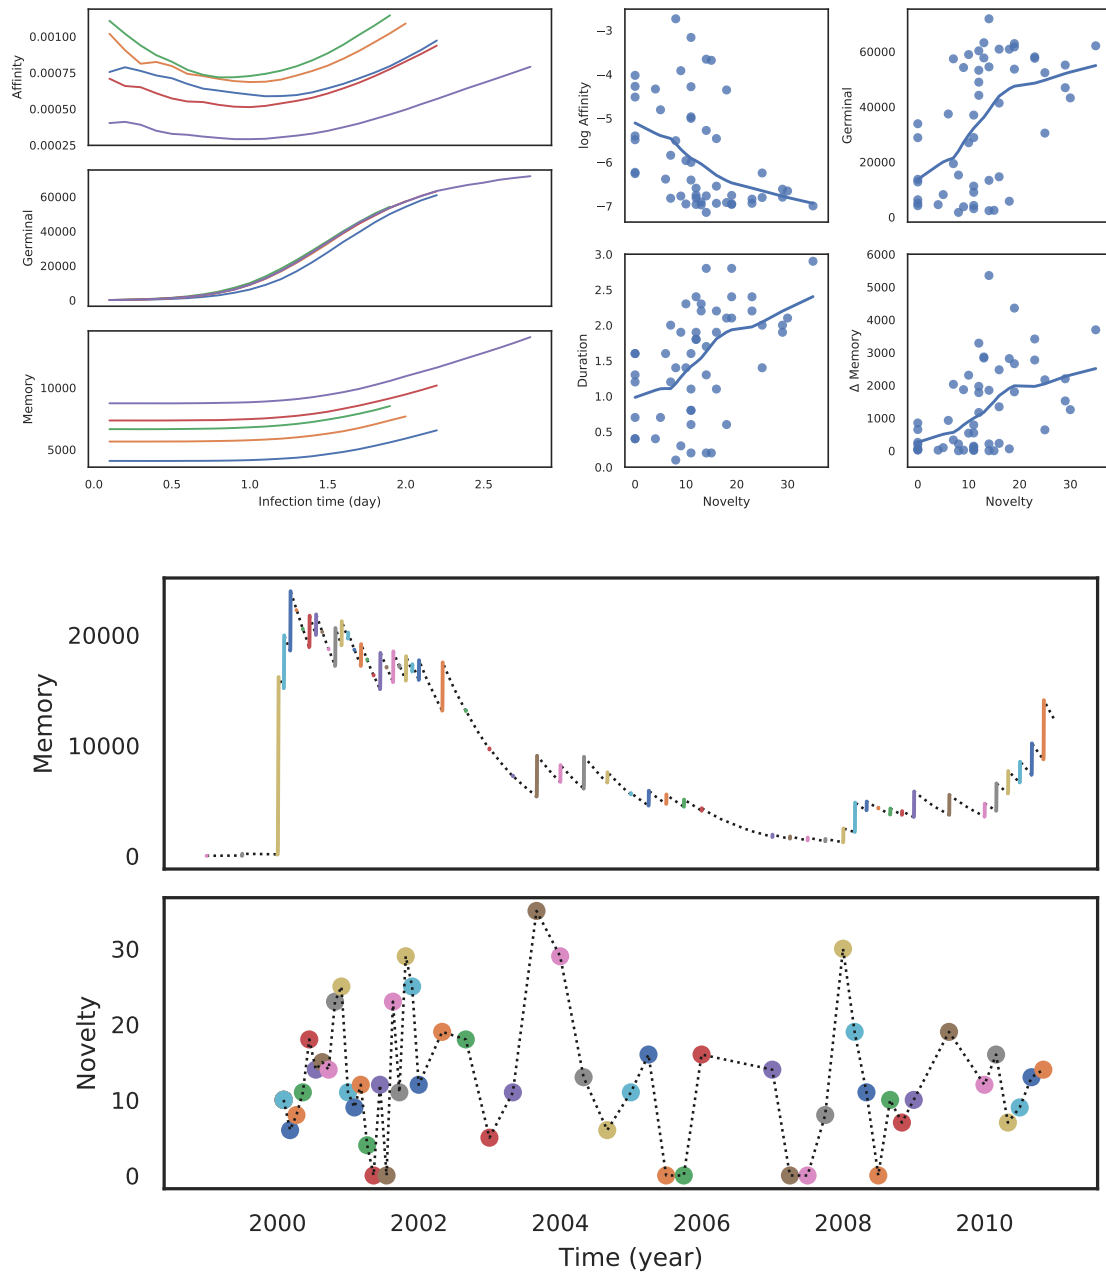

Fig. S1. a) Log average affinity of activated cells to current infection target at the end of the infection, the number of activated cells at the end of the infection, and the duration of infection by novelty of the target of one simulation under default conditions, showing the last five rounds as examples. b) Average affinity of activated cells to current infection target, the number of activated cells, and the number of memory cells by time after infection starts for the last five infections of one simulation under default conditions. Lines are fitted using the LOWESS (locally weighted scatterplot smoothing) algorithm. c) Number of memory cells and novelty of infections by time. Dormant stages are indicated by dotted lines.

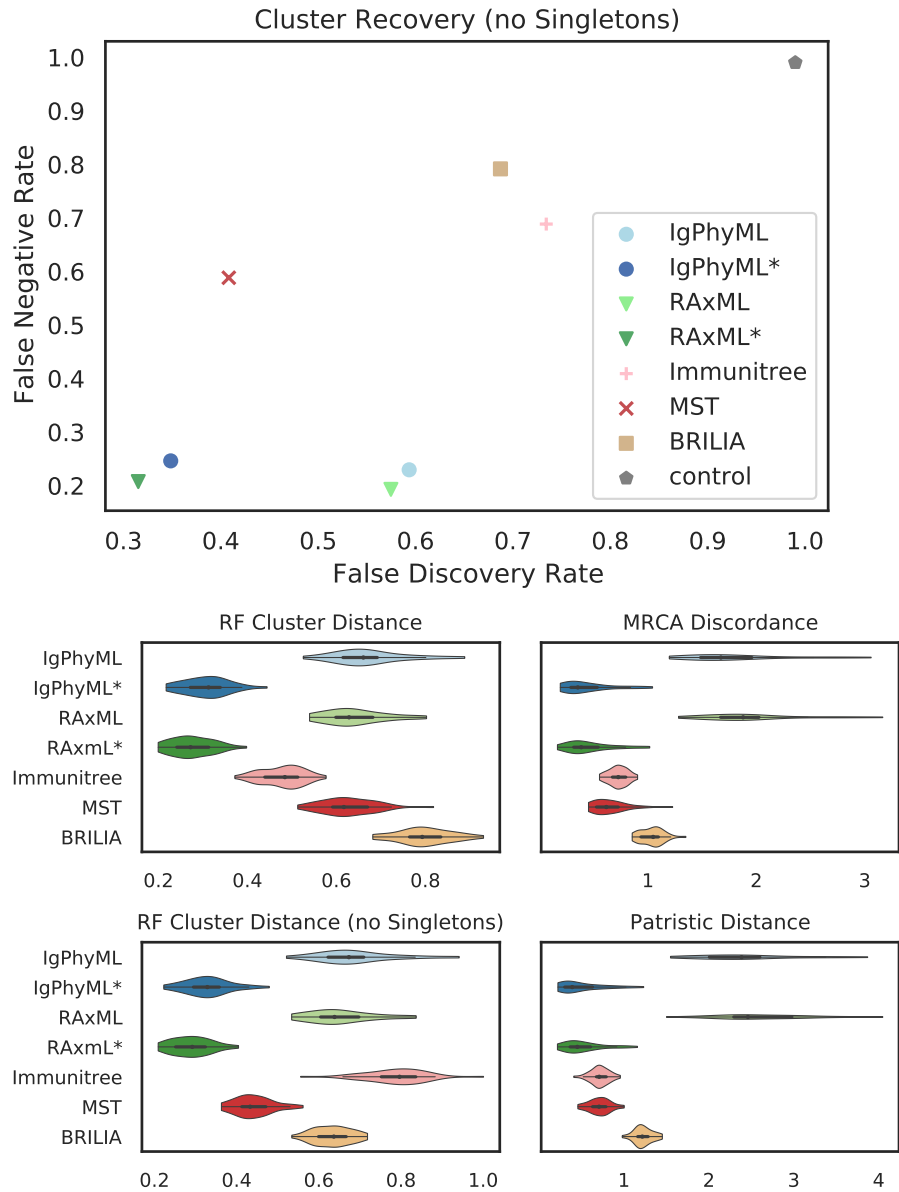

Fig. S2. Top: FNR\* and FPR\* rates excluding singletons by reconstruction methods on simulations under default conditions; Bottom: Normalized Robinson-Foulds cluster distance with and without singletons (RF and RF\*), MD and PD.

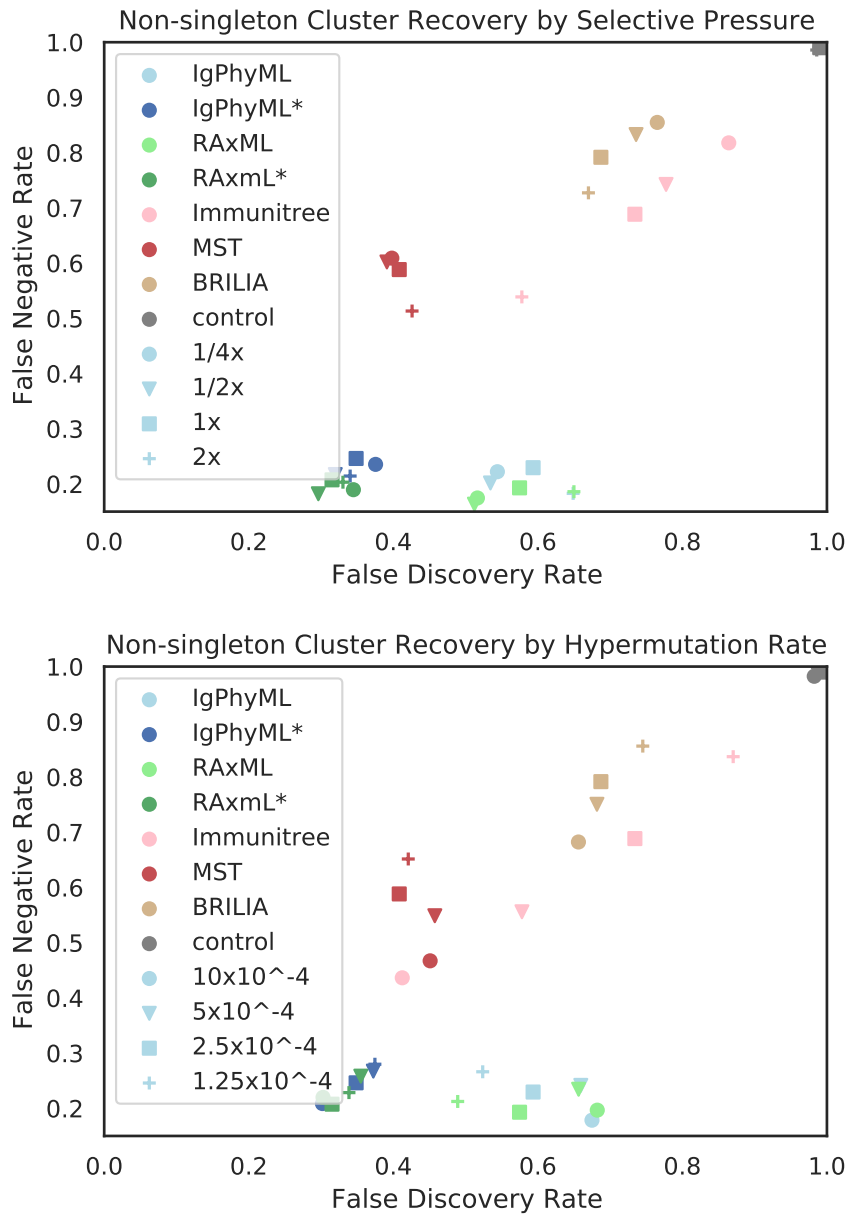

Fig. S3. Impact of selective pressure  $A$  (a) and mutation rate  $\mu$  (b) on tree inference error by FDR\* and FNR\*.

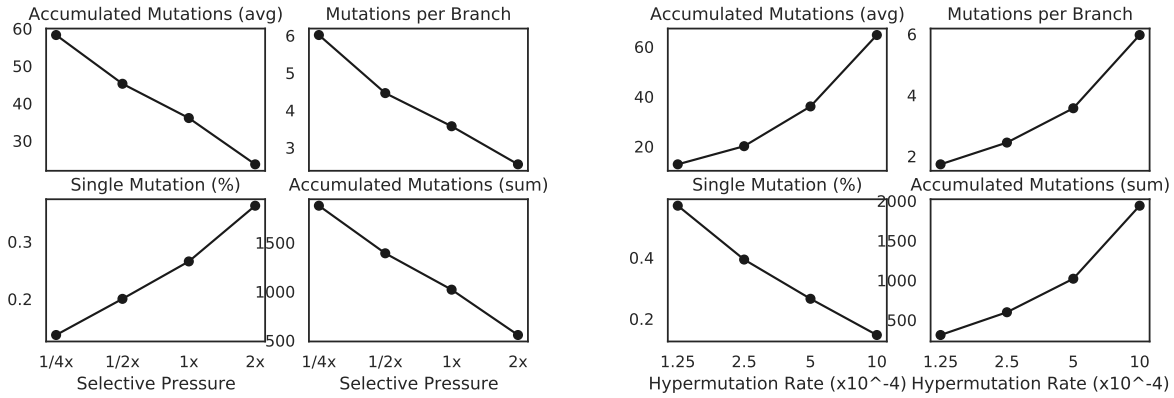

Fig. S4. Impact of selective pressure  $A$  (left) and mutation rate  $\mu$  (right) on sequence-based branch length properties on true trees.  $\mu = 5 \times 10^{-4}$  in (a-d) and  $A = 0.1$  in (e-h).

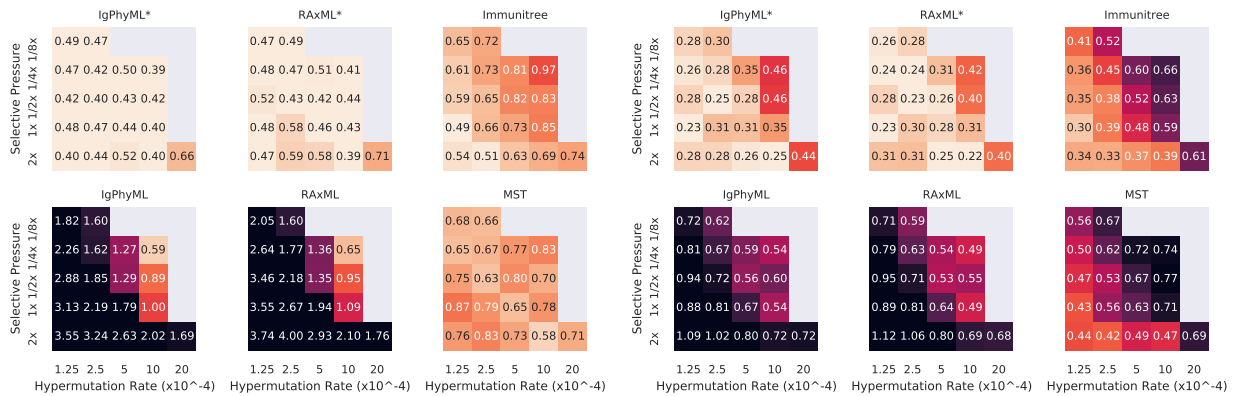

Fig. S5. For varying levels of selective pressure ( $A$ ), rate of hypermutation ( $\mu$ ), and reconstruction methods, we show MD error (left), and RF error (right). Under some conditions, reconstructed trees from phylogenetic methods are worse than random permuting labels of true tree because both MD and RF (to a lesser degree) severely penalizes resolution of multifurcated nodes.



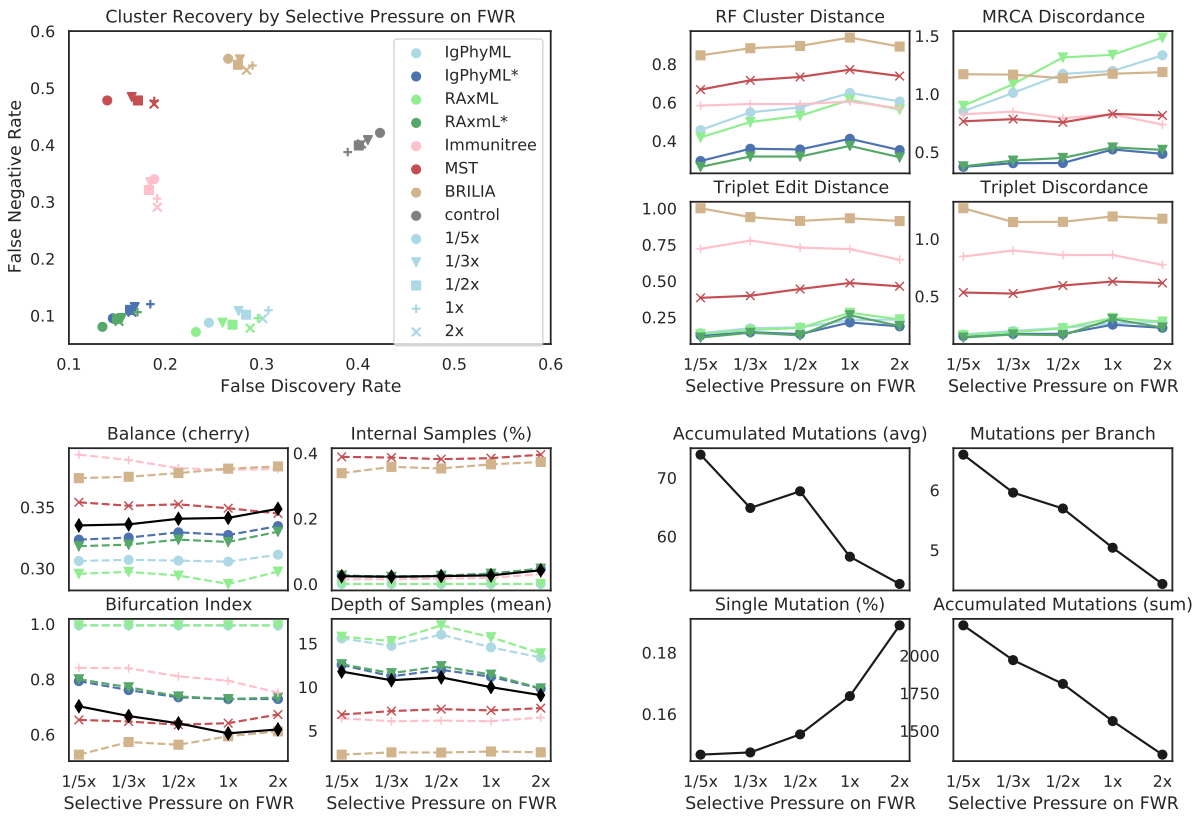

Fig. S6. a) FNR versus FDR, b) Robinson-Foulds cluster distance (RF), MRCA Discordance (MD), triplet edit distance (TED), and triplet discordance (TD) by BLOSUM weight multiplier of framework region ( $w_f$ ) and reconstruction methods. c) Properties of true (black) and reconstructed trees by BLOSUM weight multiplier of framework region (FR). d) Properties of true trees.

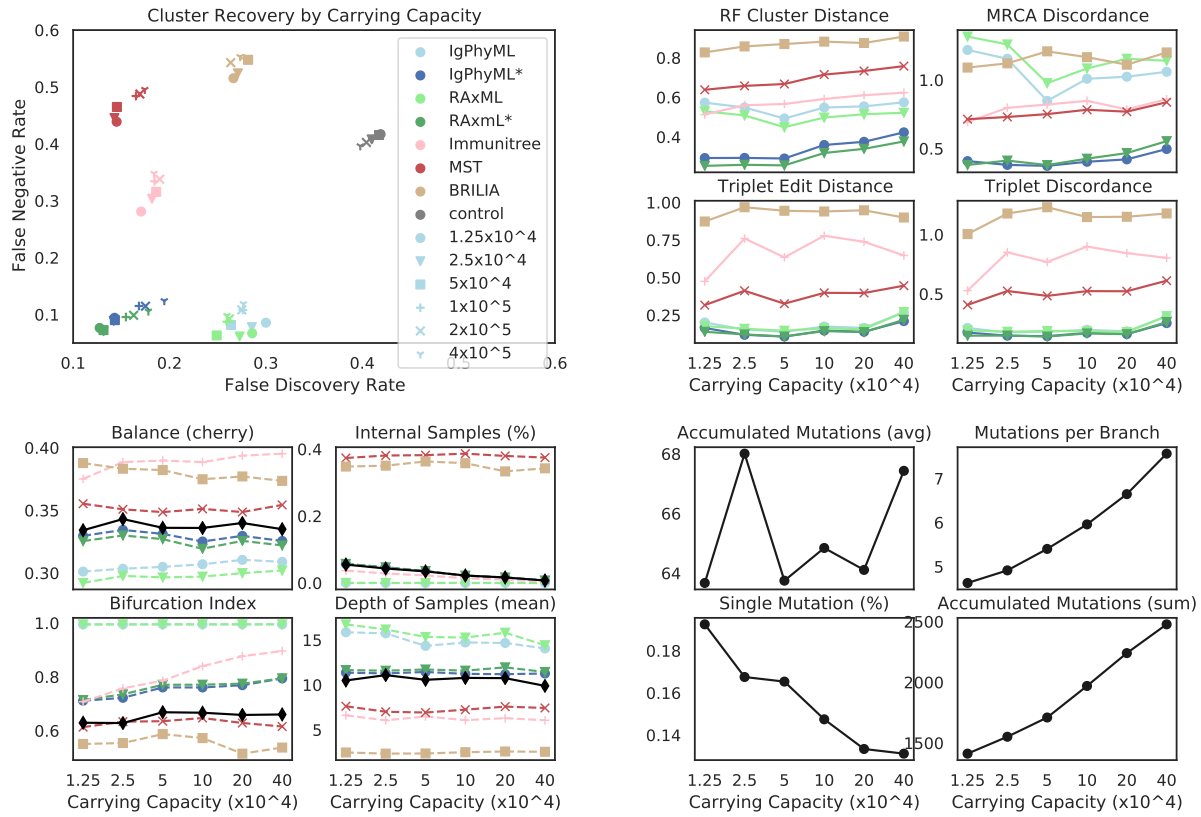

Fig. S7. a) FNR versus FDR, b) Robinson-Foulds cluster distance (RF), MRC Discordance (MD), triplet edit distance (TED), and triplet discordance (TD) by germinal center capacity ( $C$ ) and reconstruction methods. c) Properties of true (black) and reconstructed trees by carrying capacity of germinal center of FR. d) Properties of true trees.

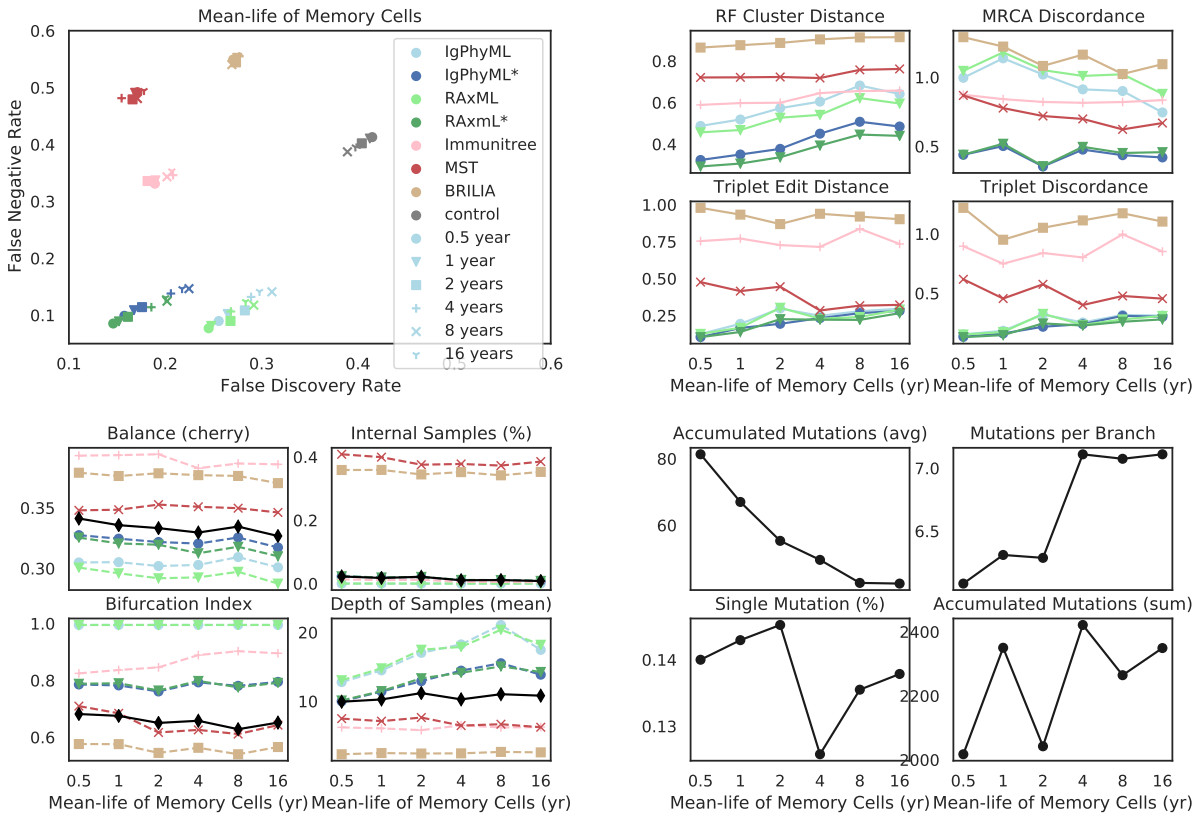

Fig. S8. a) FNR versus FDR, b) Robinson-Foulds cluster distance (RF), MRCA Discordance (MD), triplet edit distance (TED), and triplet discordance (TD) by mean memory cell life-time ( $1/\lambda'_d$ ) and reconstruction methods. c) Properties of true (black) and reconstructed trees by memory cell life (mean). d) Properties of true trees.

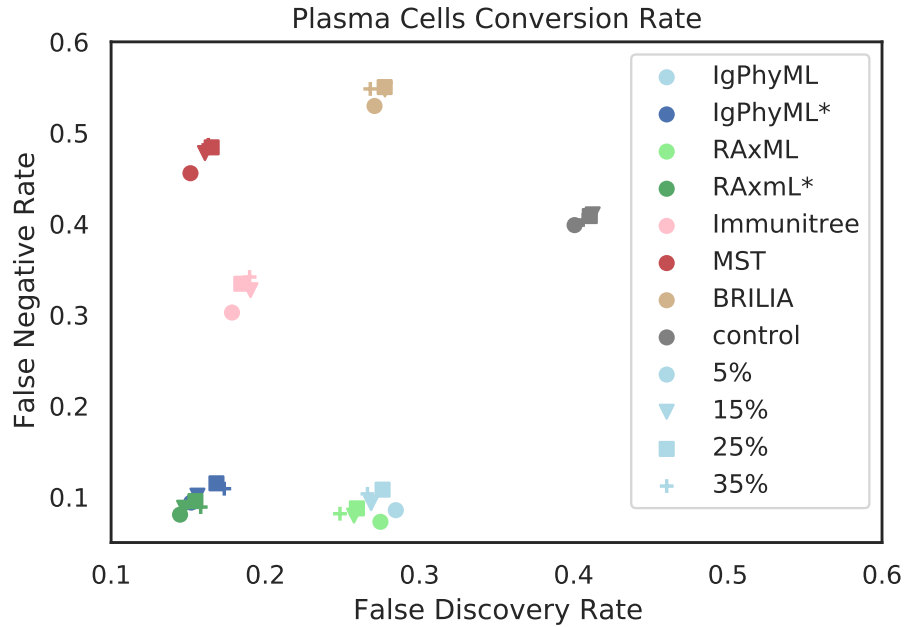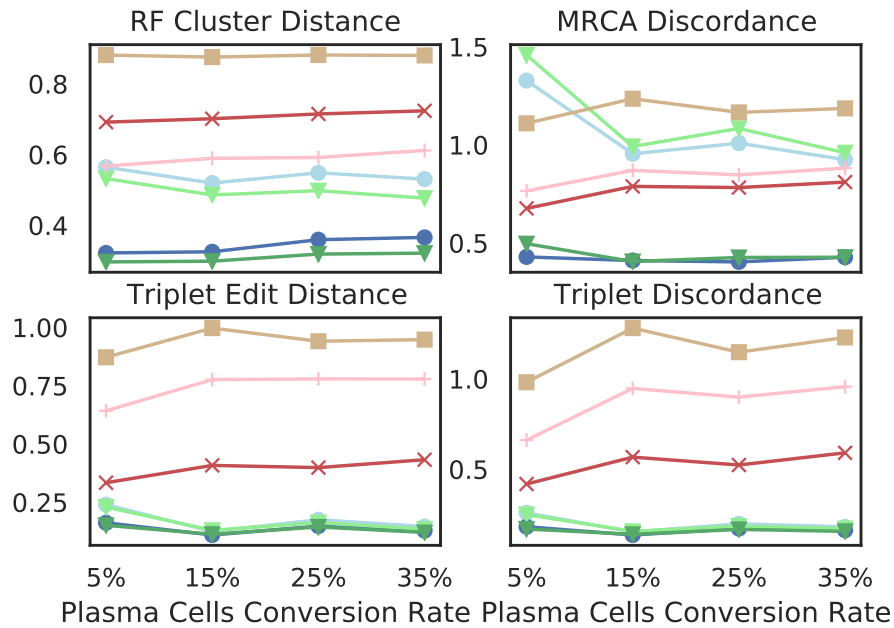

Fig. S9. a) a) FNR versus FDR, b) Robinson-Foulds cluster distance (RF), MRCA Discordance (MD), triplet edit distance (TED), and triplet discordance (TD) by fraction of activated cells turning into plasma cell per cell division ( $\rho_p$ ).

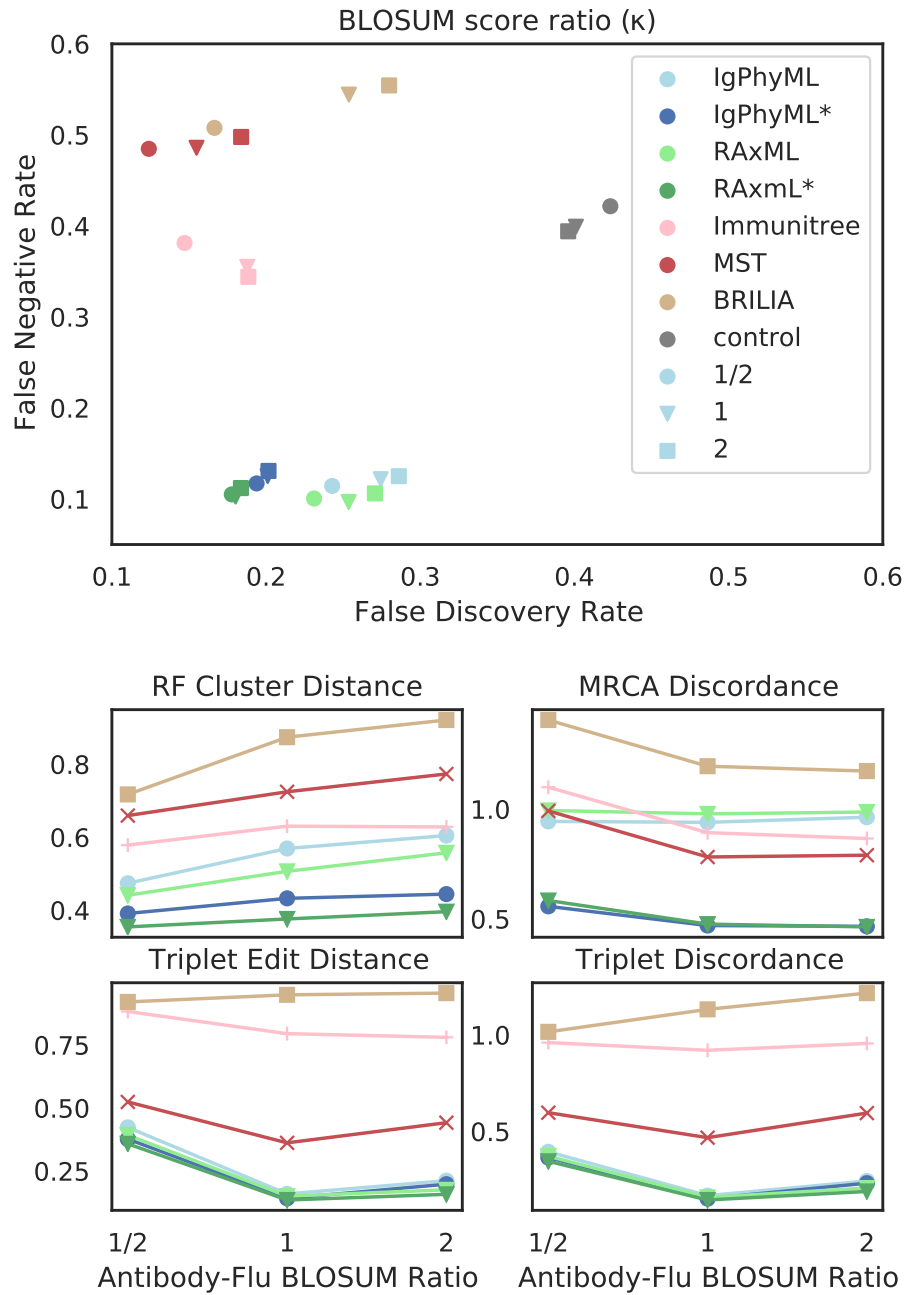

Fig. S10. a) FNR versus FDR, b) Robinson-Foulds cluster distance (RF), MRCA Discordance (MD), triplet edit distance (TED), and triplet discordance (TD) by BLOSUM score ratio of antibody-coding sequences to antigen sequences ( $\kappa$ )

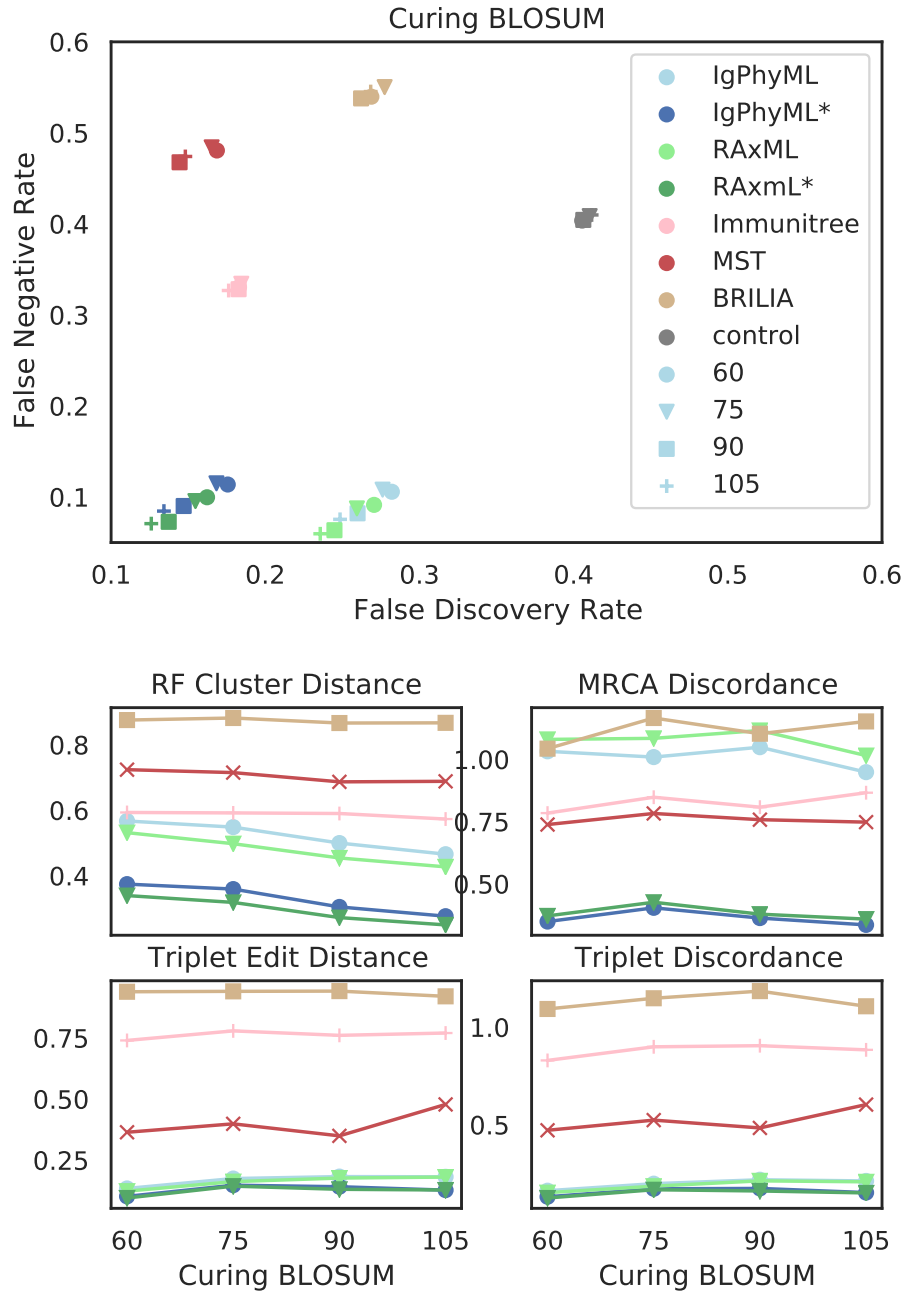

Fig. S11. a) a) FNR versus FDR, b) Robinson-Foulds cluster distance (RF), MRCA Discordance (MD), triplet edit distance (TED), and triplet discordance (TD) by BLOSUM score of activated cell antibody-coding sequences that leads to cure ( $\Delta'_0$ ).

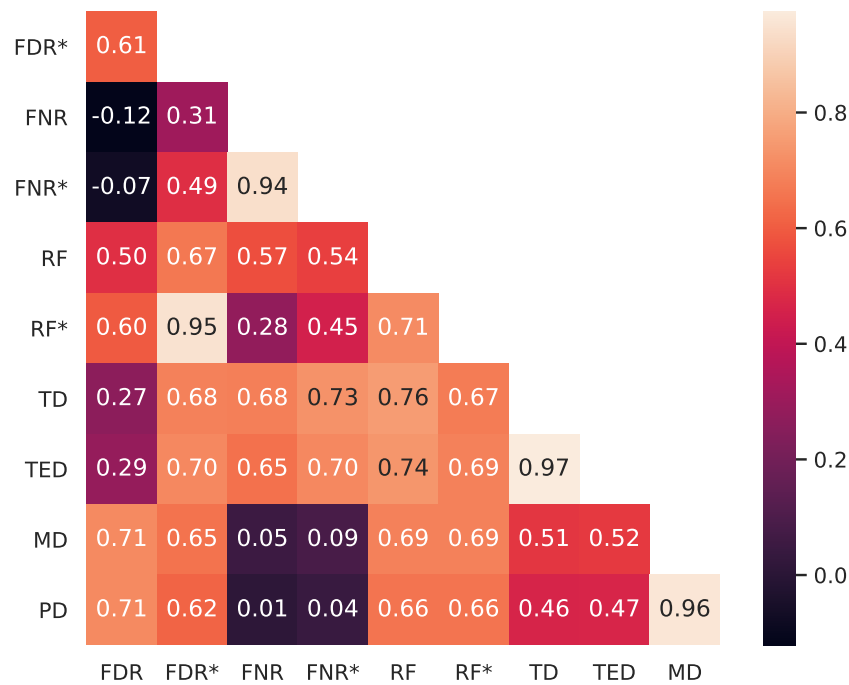

Fig. S12. Correlations of evaluation metrics. For each replicate of each simulation condition, we compute Spearman's rank correlation coefficient of reconstruction method for each pair of evaluation metrics. Here, we show the average coefficient over all replicates of all simulation conditions.

SUPPLEMENTARY ALGORITHMS

---

**Algorithm S1** Simulating the next event and update time and  $S$  accordingly. Before running this procedure, we have computed  $\mathbf{S}$  and  $\theta_\alpha = \sum_{i \in S} \mathbf{x}_i^\alpha$  for all  $\alpha$  from the previous calls to this function (i.e., previous time steps). For each  $\alpha$ , we have also built an interval tree  $T_\alpha$  on leafset  $S$  and each node  $v$  storing the summation of  $\mathbf{x}_i^\alpha$  for each leaf  $i$  under  $v$ .

---

**procedure** SAMPLETREE( $\alpha, v$ )

**if**  $v$  is a leaf node **then**

**return**  $v$

**else**

$L \leftarrow$  the sum of  $\mathbf{x}_i^\alpha$  for each leaf  $i$  under left child of  $v$

$R \leftarrow$  the sum of  $\mathbf{x}_i^\alpha$  for each leaf  $i$  under right child of  $v$

$O \leftarrow$  the outcome of a flip of a biased coin with probability of being head  $\frac{L}{L+R}$

**if**  $O = \text{Head}$  **then**

**return** SAMPLETREE( $\alpha$ , the left child of  $v$ )

**else**

**return** SAMPLETREE( $\alpha$ , the right child of  $v$ )

**procedure** SIMULATINGONEEVENT

time  $\leftarrow$  time + a random sample from exponential distribution where  $\lambda = \frac{\sum_{\alpha, \beta \in \Gamma} (P_{\alpha, \beta} \mathbf{S}^\beta \theta_\alpha)}{\sum_{\beta \in \Gamma} Q_\beta \mathbf{S}^\beta}$

$(\alpha, \beta) \leftarrow$  a random sample from distribution  $Pr(\alpha, \beta) = \frac{P_{\alpha, \beta} \mathbf{S}^\beta \theta_\alpha}{\sum_{\bar{\alpha}, \bar{\beta} \in \Gamma} (P_{\bar{\alpha}, \bar{\beta}} \mathbf{S}^{\bar{\beta}} \theta_{\bar{\alpha}})}$

$i \leftarrow$  SAMPLETREE( $\alpha$ , the root of  $T_\alpha$ )

$E \leftarrow$  a sample from  $Pr(E = \text{Birth}) = \frac{B_{\alpha, \beta}}{P_{\alpha, \beta}}, Pr(E = \text{Death}) = \frac{D_{\alpha, \beta}}{P_{\alpha, \beta}}, Pr(E = \text{Transformation}) = \frac{T_{\alpha, \beta}}{P_{\alpha, \beta}}$

**if**  $E = \text{Birth}$  **then**

$(j, k) \leftarrow$  a sample from distribution of outcomes of birth event of  $i$

$\mathbf{S} \leftarrow \mathbf{S} + \mathbf{x}_j + \mathbf{x}_k$

$S \leftarrow S \cup \{j, k\}$

**for**  $\alpha \in \Gamma$  **do**

$\theta_\alpha \leftarrow \theta_\alpha + \mathbf{x}_j^\alpha + \mathbf{x}_k^\alpha$

    add leaves  $j$  and  $k$  to  $T_\alpha$  while keeping the tree balanced using Algorithm S2

**if**  $E = \text{Transformation}$  **then**

$j \leftarrow$  a sample from distribution of outcomes of transformation event of  $i$

$\mathbf{S} \leftarrow \mathbf{S} + \mathbf{x}_j$

$S \leftarrow S \cup \{j\}$

**for**  $\alpha \in \Gamma$  **do**

$\theta_\alpha \leftarrow \theta_\alpha + \mathbf{x}_j^\alpha$

    add leaf  $j$  to  $T_\alpha$  while keeping the tree balanced using Algorithm S2

$\mathbf{S} \leftarrow \mathbf{S} - \mathbf{x}_i$

$S \leftarrow S - \{i\}$

**for**  $\alpha \in \Gamma$  **do**

$\theta_\alpha \leftarrow \theta_\alpha - \mathbf{x}_i^\alpha$

  remove leaf  $i$  from  $T_\alpha$ , making the leaf ready for future additions using Algorithm S2

---



---

**Algorithm S2** Exact algorithm for inserting or removing a leaf from tree  $T_\alpha$  keeping it balanced.  $T_\alpha$  is represented by a full binary tree where each leaf is labeled with either one particle or  $\emptyset$  and each node  $v$  has weight  $w_v$  equal to the sum of  $\mathbf{x}_i^\alpha$  for all leaves under  $v$  with label ( $i$ ) not being  $\emptyset$ . Assuming a stack  $S_\alpha$  keeps all leaves with label  $\emptyset$ .

---

**procedure** ADDWEIGHT( $T_\alpha, i, v, u$ )

$w_u \leftarrow w_u + \mathbf{x}_i^\alpha$

**if**  $v$  is under left subtree of  $u$  **then**

    ADDWEIGHT( $T_\alpha, i, v$ , the left child of  $u$ )

**if**  $v$  is under right subtree of  $u$  **then**

    ADDWEIGHT( $T_\alpha, i, v$ , the right child of  $u$ )

**procedure** INSERTLEAF( $T_\alpha, i$ )

**if**  $S_\alpha$  is empty **then**

$H \leftarrow$  the height of  $T_\alpha$

$T' \leftarrow T_\alpha$

$T_\alpha \leftarrow$  a full binary tree of height  $H + 1$ , all leaves labelled  $\emptyset$ , and all nodes having weight 0

    replace the left subtree of the root of  $T_\alpha$  with  $T'$

    the weight the root of  $T_\alpha \leftarrow$  the weight of the left child of the root of  $T_\alpha$

    push all leaves under right child of the root of  $T_\alpha$  into  $S_\alpha$

$v \leftarrow$  pop one element from  $S_\alpha$

label of  $v \leftarrow i$

ADDWEIGHT( $T_\alpha, i, v$ , the root of  $T_\alpha$ )

**procedure** REDUCEWEIGHT( $T_\alpha, i, v, u$ )

$w_u \leftarrow w_u - \mathbf{x}_i^\alpha$

**if**  $v$  is under left subtree of  $u$  **then**

    REDUCEWEIGHT( $T_\alpha, i, v$ , the left child of  $u$ )

**if**  $v$  is under right subtree of  $u$  **then**

    REDUCEWEIGHT( $T_\alpha, i, v$ , the right child of  $u$ )

**procedure** REMOVELEAF( $T_\alpha, i$ )

$v \leftarrow$  leaf of  $T_\alpha$  with label  $i$

label of  $v \leftarrow \emptyset$

push  $v$  onto  $S_\alpha$

REDUCEWEIGHT( $T_\alpha, i, v$ , the root of  $T_\alpha$ )

---

---

**Algorithm S3** Heuristics for choosing target sequences to minimize the objective function (3).

---

```

for  $i \leftarrow 2$  to  $r$  do
  for  $q \in \text{CDR}$  do
     $C_i^{(q)} \leftarrow 0$ 
     $\zeta_i^{(q)} \leftarrow \zeta_1^{(q)}$ 
  for  $p \leftarrow 1$  to  $L_\eta$  do
     $t \leftarrow \text{Poisson}(\kappa)$ 
    for  $u \leftarrow 1$  to  $t$  do
       $q \leftarrow$  a uniform random element of CDR where  $\eta_1^{(p)} = \zeta_1^{(q)}$ 
      for  $i \leftarrow 2$  to  $r$  do
        if  $\eta_i^{(p)} \neq \eta_1^{(p)}$  then
           $C_i^{(q)} \leftarrow C_i^{(q)} + 1$ 
           $\zeta_i^{(q)} \leftarrow \eta_i^{(p)}$  with probability  $1/C_i^{(q)}$ 
     $b \leftarrow \text{True}$ 
  while  $b = \text{True}$  do
     $b \leftarrow \text{False}$ 
    for  $i \leftarrow 2$  to  $r$  do
      for  $q \in \text{CDR}$  do
        for  $s \in$  nucleotide alphabet do
          if replacing  $\zeta_i^{(q)}$  with  $s$  reduces the objective function then
             $b \leftarrow \text{True}$ 
             $\zeta_i^{(q)} \leftarrow s$ 

```

---



---

**Algorithm S4** Let each label be uniformly randomly assigned an element in a finite Abelian group with large enough order (e.g., 64-bit integers). To compute FNR, FDR, and RF, we just need to compute  $|\phi(R)| = |S_R|$ ,  $|\phi(E)| = |S_E|$ , and  $|\phi(R) \cap \phi(E)| = |S_R \cap S_E|$ , where set  $S_T$  for tree  $T$  can be computed by calling COMPUTESET( $T$ , the root of  $T$ ).

---

```

procedure COMPUTESET( $T, v$ )
   $w \leftarrow$  the element assigned to the label of  $v$ , if  $v$  has label; otherwise,  $w \leftarrow 0$ .
  for  $u$  in the children of  $v$  do
     $w \leftarrow w + \text{COMPUTESET}(T, u)$ 
  add element  $w$  to set  $S_T$ 
  return  $w$ 

```

---
